# Supplementary material for: All-cause mortality among patients treated with repurposed antivirals and antibiotics for COVID-19 in Mexico City: A Real-World Observational Study
Source: bioRxiv or medRxiv preprint supplement (doi:10.1101/2020.10.13.20211797), 2021-01-01

## **Supplementary Material**

**Supplementary Table 1.** Signs and symptoms in ambulatory patients

**Supplementary Table 2.** Signs and symptoms in hospitalized patients

**Supplementary Table 3.** Baseline and follow-up characteristics of survivors and non-survivors

**Supplementary Table 4.** Survival analysis of patients undergoing IMV

**Supplementary Table 5.** Survival analysis of patients admitted to ICU

**Supplementary Table 6.** Survival analysis of non-pregnant/puerperal adults

**Supplementary Table 7.** Survival analysis of children and adolescents

**Supplementary Table 8.** Survival analysis of pregnant women

**Supplementary Table 9.** Unadjusted Cox regression models for mortality in all patients, ambulatory, hospitalized, non-critical, and critical patients

**Supplementary Table 10.** Mortality risk in patients undergoing IMV

**Supplementary Table 11.** Mortality risk in patients admitted to ICU

**Supplementary Table 12.** Mortality risk in non-pregnant/puerperal adults

**Supplementary Table 13.** Mortality risk in children and adolescents

**Supplementary Table 14.** Mortality risk in pregnant women

**Supplementary Table 15.** E-values for the general population, ambulatory, hospitalized, non-critical, and critical patients

**Supplementary Table 16.** E-values for IMV, ICU, Non-pregnant/puerperal adults, and children and adolescents

**Supplementary Table 17.** Baseline characteristics of patients with complete dates of antiviral initiation

**Supplementary Table 18.** Survival analysis of early and late use of antivirals

**Supplementary Figure 1.** Timing of symptom onset, initiation of antiviral, and hospitalization

**Supplementary Figure 2.** Comparison of hospitalization rates between early and late use of antivirals

Supplementary Table 1. Signs and symptoms in laboratory-confirmed COVID-19 ambulatory patients treated with antivirals and/or antibiotics in 603 accredited medical units in Mexico City between February 24, 2020 and September 14, 2020.

|                                                                                               | No antiviral/<br>antibiotic<br>n=98060 | Acyclovir<br>n=30      | Amantadine<br>n=282 | Lopinavir-<br>Ritonavir<br>n=8 | Osetamivir<br>n=3187   | Rimantadine<br>n=48    | Zanamivir<br>n=19 | Antibiotic<br>only<br>n=8268 | Total<br>n=109902 | P value |
|-----------------------------------------------------------------------------------------------|----------------------------------------|------------------------|---------------------|--------------------------------|------------------------|------------------------|-------------------|------------------------------|-------------------|---------|
| Number of signs and symptoms, mean (SD)                                                       | 5.8 (3.8)                              | 6.8 (3.3) <sup>a</sup> | 7.2 (3.6)           | 7.9 (5.3)                      | 7.8 (3.3) <sup>a</sup> | 7.6 (3.2) <sup>a</sup> | 6.7 (4.6)         | 7.0 (3.5) <sup>a</sup>       | 5.9 (3.8)         | <.001   |
| Fever                                                                                         | 52966 (54)                             | 21 (70)                | 169 (59.9)          | 5 (62.5)                       | 2465 (77.3)            | 31 (64.6)              | 13 (68.4)         | 5471 (66.2)                  | 61141 (55.6)      | <.001   |
| Cough                                                                                         | 65216 (66.5)                           | 19 (63.3)              | 216 (76.6)          | 6 (75)                         | 2583 (81)              | 34 (70.8)              | 15 (78.9)         | 6071 (73.4)                  | 74160 (67.5)      | <.001   |
| Sore throat                                                                                   | 41927 (42.8)                           | 12 (40)                | 144 (51.1)          | 3 (37.5)                       | 1611 (50.5)            | 24 (50)                | 5 (26.3)          | 4388 (53.1)                  | 48114 (43.8)      | <.001   |
| Shortness of breath                                                                           | 19091 (19.5)                           | 11 (36.7)              | 63 (22.3)           | 4 (50)                         | 1010 (31.7)            | 12 (25)                | 8 (42.1)          | 2237 (27.1)                  | 22436 (20.4)      | <.001   |
| Irritability                                                                                  | 16364 (16.7)                           | 5 (16.7)               | 70 (24.8)           | 2 (25)                         | 720 (22.6)             | 11 (22.9)              | 7 (36.8)          | 1593 (19.3)                  | 18772 (17.1)      | <.001   |
| Diarrhea                                                                                      | 22096 (22.5)                           | 10 (33.3)              | 86 (30.5)           | 3 (37.5)                       | 981 (30.8)             | 12 (25)                | 7 (36.8)          | 2456 (29.7)                  | 25651 (23.3)      | <.001   |
| Chest pain                                                                                    | 23150 (23.6)                           | 9 (30)                 | 87 (30.9)           | 2 (25)                         | 1158 (36.3)            | 19 (39.6)              | 7 (36.8)          | 2494 (30.2)                  | 26926 (24.5)      | <.001   |
| Chills                                                                                        | 32621 (33.3)                           | 14 (46.7)              | 139 (49.3)          | 6 (75)                         | 1585 (49.7)            | 27 (56.3)              | 5 (26.3)          | 3482 (42.1)                  | 37879 (34.5)      | <.001   |
| Headache                                                                                      | 67181 (68.5)                           | 21 (70)                | 202 (71.6)          | 6 (75)                         | 2575 (80.8)            | 31 (64.6)              | 13 (68.4)         | 6022 (72.8)                  | 76051 (69.2)      | <.001   |
| Myalgias                                                                                      | 47106 (48)                             | 23 (76.7)              | 175 (62.1)          | 5 (62.5)                       | 2053 (64.4)            | 32 (66.7)              | 8 (42.1)          | 4993 (60.4)                  | 54395 (49.5)      | <.001   |
| Arthralgias                                                                                   | 42161 (43)                             | 18 (60)                | 155 (55)            | 4 (50)                         | 1881 (59)              | 31 (64.6)              | 6 (31.6)          | 4530 (54.8)                  | 48786 (44.4)      | <.001   |
| Abrupt deterioration                                                                          | 38549 (39.3)                           | 15 (50)                | 157 (55.7)          | 5 (62.5)                       | 1923 (60.3)            | 24 (50)                | 6 (31.6)          | 4471 (54.1)                  | 45150 (41.1)      | <.001   |
| Rhinorrhea                                                                                    | 28354 (28.9)                           | 6 (20)                 | 107 (37.9)          | 4 (50)                         | 1079 (33.9)            | 23 (47.9)              | 6 (31.6)          | 2744 (33.2)                  | 32323 (29.4)      | <.001   |
| Polypnea                                                                                      | 7412 (7.6)                             | 3 (10)                 | 37 (13.1)           | 3 (37.5)                       | 381 (12)               | 3 (6.3)                | 3 (15.8)          | 859 (10.4)                   | 8701 (7.9)        | <.001   |
| Vomit                                                                                         | 6406 (6.5)                             | 2 (6.7)                | 18 (6.4)            | 0 (0)                          | 309 (9.7)              | 6 (12.5)               | 1 (5.3)           | 696 (8.4)                    | 7438 (6.8)        | <.001   |
| Abdominal pain                                                                                | 11502 (11.7)                           | 3 (10)                 | 49 (17.4)           | 0 (0)                          | 646 (20.3)             | 8 (16.7)               | 4 (21.1)          | 1065 (12.9)                  | 13277 (12.1)      | <.001   |
| Conjunctivitis                                                                                | 12784 (13)                             | 4 (13.3)               | 53 (18.8)           | 3 (37.5)                       | 475 (14.9)             | 11 (22.9)              | 5 (26.3)          | 1315 (15.9)                  | 14650 (13.3)      | <.001   |
| Cyanosis                                                                                      | 2843 (2.9)                             | 1 (3.3)                | 9 (3.2)             | 1 (12.5)                       | 152 (4.8)              | 6 (12.5)               | 2 (10.5)          | 245 (3)                      | 3259 (3)          | <.001   |
| Sudden onset of symptoms                                                                      | 32348 (33)                             | 7 (23.3)               | 93 (33)             | 1 (12.5)                       | 1359 (42.6)            | 19 (39.6)              | 7 (36.8)          | 3067 (37.1)                  | 36901 (33.6)      | <.001   |
| Data expressed as frequency (%). P values were calculated by X <sup>2</sup> or One-way ANOVA. |                                        |                        |                     |                                |                        |                        |                   |                              |                   |         |
| a: Statistical difference with respect to No antiviral/antibiotic.<br>SD: Standard deviation  |                                        |                        |                     |                                |                        |                        |                   |                              |                   |         |

Supplementary Table 2. Signs and symptoms in laboratory-confirmed COVID-19 hospitalized patients treated with antivirals and/or antibiotics in 329 accredited medical units in Mexico City between February 24, 2020 and September 14, 2020.

|                                                                                              | No antiviral /<br>antibiotic<br>n=16083 | Acyclovir<br>n=6 | Amantadine<br>n=37 | Lopinavir-<br>Ritonavir<br>n=92 | Osetamivir<br>n=5227   | Rimantadine<br>n=13 | Zanamivir<br>n=20 | Antibiotic<br>only<br>n=5475 | Total<br>n=26953 | P value |
|----------------------------------------------------------------------------------------------|-----------------------------------------|------------------|--------------------|---------------------------------|------------------------|---------------------|-------------------|------------------------------|------------------|---------|
| Number of signs and symptoms, mean (SD)                                                      | 7.9 (3.4)                               | 6 (2.6)          | 7.9 (3.3)          | 6.6 (2.9) <sup>a</sup>          | 8.1 (3.4) <sup>a</sup> | 8.8 (2.4)           | 9.4 (2.8)         | 6.9 (3.2) <sup>a</sup>       | 7.8 (3.4)        | <.001   |
| Fever                                                                                        | 13045 (81.1)                            | 4 (66.7)         | 29 (78.4)          | 76 (82.6)                       | 4498 (86.1)            | 11 (84.6)           | 18 (90)           | 4298 (78.5)                  | 21979 (81.5)     | <.001   |
| Cough                                                                                        | 13151 (81.8)                            | 5 (83.3)         | 29 (78.4)          | 61 (66.3)                       | 4472 (85.6)            | 8 (61.5)            | 20 (100)          | 4300 (78.5)                  | 22046 (81.8)     | <.001   |
| Sore throat                                                                                  | 6918 (43)                               | 0 (0)            | 15 (40.5)          | 28 (30.4)                       | 2090 (40)              | 5 (38.5)            | 17 (85)           | 1853 (33.8)                  | 10926 (40.5)     | <.001   |
| Shortness of breath                                                                          | 11970 (74.4)                            | 3 (50)           | 22 (59.5)          | 62 (67.4)                       | 4160 (79.6)            | 10 (76.9)           | 15 (75)           | 4264 (77.9)                  | 20506 (76.1)     | <.001   |
| Irritability                                                                                 | 3096 (19.3)                             | 0 (0.0)          | 11 (29.7)          | 5 (5.4)                         | 1273 (24.4)            | 3 (23.1)            | 6 (3)             | 932 (17)                     | 5326 (19.8)      | <.001   |
| Diarrhea                                                                                     | 3725 (23.2)                             | 1 (16.7)         | 10 (27)            | 16 (17.4)                       | 1199 (22.9)            | 3 (23.1)            | 6 (30)            | 1038 (19)                    | 5998 (22.3)      | <.001   |
| Chest pain                                                                                   | 6374 (39.6)                             | 3 (50.0)         | 18 (48.6)          | 20 (21.7)                       | 1821 (34.8)            | 6 (46.2)            | 8 (40)            | 1675 (30.6)                  | 9925 (36.8)      | <.001   |
| Chills                                                                                       | 6784 (42.2)                             | 2 (33.3)         | 19 (51.4)          | 28 (30.4)                       | 2031 (38.9)            | 6 (46.2)            | 12 (60)           | 1521 (27.8)                  | 10403 (38.6)     | <.001   |
| Headache                                                                                     | 11712 (72.8)                            | 1 (16.7)         | 25 (67.6)          | 53 (57.6)                       | 3773 (72.2)            | 9 (69.2)            | 16 (80)           | 3378 (61.7)                  | 18967 (70.4)     | <.001   |
| Myalgias                                                                                     | 10086 (62.7)                            | 4 (66.7)         | 26 (70.3)          | 55 (59.8)                       | 3021 (57.8)            | 11 (84.6)           | 16 (80)           | 3052 (55.7)                  | 16271 (60.4)     | <.001   |
| Arthralgias                                                                                  | 9631 (59.9)                             | 4 (66.7)         | 24 (64.9)          | 44 (47.8)                       | 2965 (56.7)            | 11 (84.6)           | 17 (85)           | 2899 (52.9)                  | 15595 (57.9)     | <.001   |
| Abrupt deterioration                                                                         | 10442 (64.9)                            | 5 (83.3)         | 23 (62.2)          | 61 (66.3)                       | 3444 (65.9)            | 10 (76.9)           | 14 (70)           | 3311 (60.5)                  | 17310 (64.2)     | <.001   |
| Rhinorrhea                                                                                   | 3781 (23.5)                             | 0 (0)            | 11 (29.7)          | 16 (17.4)                       | 1204 (23)              | 4 (30.8)            | 5 (25)            | 944 (17.2)                   | 5965 (22.1)      | <.001   |
| Polypnea                                                                                     | 4565 (28.4)                             | 0 (0)            | 9 (24.3)           | 10 (10.9)                       | 1466 (28)              | 4 (30.8)            | 3 (15)            | 1110 (20.3)                  | 7167 (26.6)      | <.001   |
| Vomit                                                                                        | 1688 (10.5)                             | 1 (16.7)         | 5 (13.5)           | 7 (7.6)                         | 561 (10.7)             | 2 (15.4)            | 1 (5)             | 420 (7.7)                    | 2685 (10)        | <.001   |
| Abdominal pain                                                                               | 2578 (16)                               | 0 (0)            | 11 (29.7)          | 8 (8.7)                         | 915 (17.5)             | 2 (15.4)            | 3 (15)            | 544 (9.9)                    | 4061 (15.1)      | <.001   |
| Conjunctivitis                                                                               | 1493 (9.3)                              | 0 (0)            | 2 (5.4)            | 4 (4.3)                         | 487 (9.3)              | 0 (0)               | 1 (5)             | 304 (5.6)                    | 2291 (8.5)       | <.001   |
| Cyanosis                                                                                     | 1618 (10.1)                             | 0 (0)            | 3 (8.1)            | 3 (3.3)                         | 664 (12.7)             | 2 (15.4)            | 1 (5)             | 367 (6.7)                    | 2658 (9.9)       | <.001   |
| Sudden onset of symptoms                                                                     | 5259 (32.7)                             | 3 (50)           | 3 (8.1)            | 47 (51.1)                       | 2472 (47.3)            | 7 (53.8)            | 9 (45)            | 2022 (36.9)                  | 9822 (36.4)      | <.001   |
| Data expressed as frequency (%). P values were calculated by $\chi^2$ or One-way ANOVA.      |                                         |                  |                    |                                 |                        |                     |                   |                              |                  |         |
| a: Statistical difference with respect to No antiviral/antibiotic.<br>SD: Standard deviation |                                         |                  |                    |                                 |                        |                     |                   |                              |                  |         |

Supplementary Table 3. Baseline and follow-up characteristics of laboratory confirmed COVID-19 survivors and non-survivors who received medical attention in 688 accredited units in Mexico City between February 24, 2020 and September 14, 2020.

|                                 | <b>Total population<br/>n=136855</b> | <b>Survivors<br/>n=125176</b> | <b>Non-survivors<br/>n=11679</b> | <b>P Value</b> |
|---------------------------------|--------------------------------------|-------------------------------|----------------------------------|----------------|
| Sex                             |                                      |                               |                                  |                |
| Women                           | 66683 (48.7)                         | 62907 (50.3)                  | 3776 (32.3)                      | <.001          |
| Men                             | 70172 (51.3)                         | 62269 (49.7)                  | 7903 (67.7)                      |                |
| Age, mean (SD)                  | 44.2 (16.8)                          | 42.5 (15.9)                   | 62 (14.1)                        | <.001          |
| Age categories                  |                                      |                               |                                  |                |
| 0-19 years                      | 7558 (5.5)                           | 7514 (6)                      | 44 (0.4)                         | <.001          |
| 20-29 years                     | 20098 (14.7)                         | 19974 (16)                    | 124 (1.1)                        |                |
| 30-39 years                     | 29434 (21.5)                         | 28909 (23.1)                  | 525 (4.5)                        |                |
| 40-49 years                     | 29553 (21.6)                         | 28084 (22.4)                  | 1469 (12.6)                      |                |
| 50-59 years                     | 24928 (18.2)                         | 22298 (17.8)                  | 2630 (22.5)                      |                |
| 60-69 years                     | 15070 (11)                           | 11840 (9.5)                   | 3230 (27.7)                      |                |
| 70-79 years                     | 7183 (5.2)                           | 4731 (3.8)                    | 2452 (21)                        |                |
| 80-89 years                     | 2594 (1.9)                           | 1540 (1.2)                    | 1054 (9)                         |                |
| 90-99 years                     | 419 (0.3)                            | 270 (0.2)                     | 149 (1.3)                        |                |
| ≥100 years                      | 18 (0.01)                            | 16 (0.01)                     | 2 (0.001)                        |                |
| Indigenous self-identification  | 713 (0.5)                            | 639 (0.5)                     | 74 (0.6)                         | .08            |
| Occupation                      |                                      |                               |                                  |                |
| Technical services              | 1916 (1.4)                           | 1702 (1.4)                    | 214 (1.8)                        | <.001          |
| Education                       | 10006 (7.3)                          | 9923 (7.9)                    | 83 (0.7)                         |                |
| Healthcare                      | 17281 (12.6)                         | 16954 (13.5)                  | 327 (2.8)                        |                |
| Agricultural activities         | 302 (0.2)                            | 244 (0.2)                     | 58 (0.5)                         |                |
| Commerce                        | 50450 (36.9)                         | 47070 (37.6)                  | 3380 (28.9)                      |                |
| Other                           | 24630 (18)                           | 22383 (17.9)                  | 2247 (19.2)                      |                |
| Unemployed                      | 5685 (4.2)                           | 4539 (3.6)                    | 1146 (9.8)                       |                |
| Stay-at-home                    | 26585 (19.4)                         | 22361 (17.9)                  | 4224 (36.2)                      |                |
| Last-season flu vaccination     | 25691 (19.7)                         | 24570 (20.7)                  | 1121 (9.6)                       |                |
| Special populations             |                                      |                               |                                  |                |
| Pregnancy                       | 583 (0.9)                            | 573 (0.9)                     | 10 (0.3)                         | <.001          |
| Age during pregnancy, mean (SD) | 29.8 (7.4)                           | 29.8 (7.5)                    | 32.7 (6)                         | .2             |
| Last-season flu vaccination     | 161 (27.6)                           | 158 (27.6)                    | 3 (30)                           | .9             |
| Pregnancy Age                   |                                      |                               |                                  |                |
| Early adolescent (≤14 years)    | 2 (0.3)                              | 2 (0.3)                       | 0 (0)                            | .2             |
| Late adolescent (15-19 years)   | 34 (5.8)                             | 34 (5.9)                      | 0 (0)                            |                |
| Normal age (20-34 years)        | 404 (69.3)                           | 398 (69.5)                    | 6 (60)                           |                |

|                                                  |               |               |              |       |
|--------------------------------------------------|---------------|---------------|--------------|-------|
| Advanced maternal age ( $\geq 35$ years)         | 143 (24.5)    | 139 (24.3)    | 4 (40)       |       |
| Trimester of pregnancy                           |               |               |              |       |
| First trimester                                  | 114 (19.6)    | 114 (19.9)    | 0 (0.0)      | <.001 |
| Second trimester                                 | 177 (30.4)    | 174 (30.4)    | 3 (30)       |       |
| Third trimester                                  | 292 (50.1)    | 285 (49.7)    | 7 (70)       |       |
| Puerperium                                       | 103 (0.2)     | 102 (0.2)     | 1 (0.03)     | .9    |
| Days of puerperium                               |               |               |              |       |
| 1 day                                            | 33 (32)       | 32 (31.4)     | 1 (100)      | .2    |
| 2-7 days                                         | 33 (32)       | 33 (32.4)     | 0 (0)        |       |
| 8-42 days                                        | 37 (35.9)     | 37 (36.3)     | 0 (0)        |       |
| Age during puerperium, mean (SD)                 | 31.9 (9.7)    | 31.9 (9.7)    | 24           | .5    |
| Last-season flu vaccination                      | 22 (21.4)     | 22 (21.6)     | 0 (0)        | .6    |
| Children and adolescents (<18 years)             | 5791 (4.2)    | 5751 (4.6)    | 40 (0.3)     | <.001 |
| Age, mean (SD)                                   | 10.9 (5.2)    | 10.9 (5.2)    | 7.5 (6.4)    | <.001 |
| Last-season flu vaccination                      | 1213 (20.9)   | 1211 (21.1)   | 2 (5)        | .01   |
| Non-pregnant/puerperal adults ( $\geq 18$ years) | 130378 (95.3) | 118750 (94.9) | 11628 (99.6) | <.001 |
| Age, mean (SD)                                   | 45.7 (15.5)   | 44.1 (14.7)   | 62.2 (13.7)  | <.001 |
| Last-season flu vaccination                      | 25691 (19.7)  | 24570 (20.7)  | 1121 (9.6)   | <.001 |
| Comorbidities                                    |               |               |              |       |
| Diabetes                                         | 18229 (13.3)  | 14136 (11.3)  | 4093 (35)    | <.001 |
| COPD                                             | 1741 (1.3)    | 1184 (0.9)    | 557 (4.8)    | <.001 |
| Asthma                                           | 3035 (2.2)    | 2858 (2.3)    | 177 (1.5)    | <.001 |
| Immunosuppression                                | 1758 (1.3)    | 1380 (1.1)    | 378 (3.2)    | <.001 |
| Hypertension                                     | 22185 (16.2)  | 17574 (14)    | 4611 (39.5)  | <.001 |
| HIV/AIDS                                         | 573 (0.4)     | 509 (0.4)     | 64 (0.5)     | .02   |
| Cardiovascular disease                           | 2724 (2)      | 2128 (1.7)    | 596 (5.1)    | <.001 |
| Obesity                                          | 23848 (17.4)  | 21072 (16.8)  | 2776 (23.8)  | <.001 |
| Chronic kidney disease                           | 2067 (1.5)    | 1298 (1)      | 769 (6.6)    | <.001 |
| Smoker                                           | 14727 (10.8)  | 13437 (10.7)  | 1290 (11)    | .3    |
| Time from symptom onset to medical attention     | 4.5 (3.9)     | 4.5 (3.8)     | 4.9 (3.9)    | <.001 |
| Baseline symptoms                                |               |               |              |       |
| Fever                                            | 83120 (60.7)  | 73561 (58.8)  | 9559 (81.8)  | <.001 |
| Cough                                            | 96206 (70.3)  | 86484 (69.1)  | 9722 (83.2)  | <.001 |
| Sore throat                                      | 59040 (43.1)  | 54325 (43.4)  | 4715 (40.4)  | <.001 |
| Shortness of breath                              | 42942 (31.4)  | 33762 (27)    | 9180 (78.6)  | <.001 |
| Irritability                                     | 24098 (17.6)  | 21767 (17.4)  | 2331 (20)    | <.001 |
| Diarrhea                                         | 31649 (23.1)  | 29141 (23.3)  | 2508 (21.5)  | <.001 |
| Chest pain                                       | 36851 (26.9)  | 32498 (26)    | 4353 (37.3)  | <.001 |
| Chills                                           | 48282 (35.3)  | 43660 (34.9)  | 4622 (39.6)  | <.001 |

|                                      |               |               |             |       |
|--------------------------------------|---------------|---------------|-------------|-------|
| Headache                             | 95018 (69.4)  | 86872 (69.4)  | 8146 (69.7) | .4    |
| Myalgias                             | 70666 (51.6)  | 63547 (50.8)  | 7119 (61.0) | <.001 |
| Arthralgias                          | 64381 (47)    | 57539 (46)    | 6842 (58.6) | <.001 |
| Abrupt deterioration                 | 62460 (45.6)  | 54794 (43.8)  | 7666 (65.6) | <.001 |
| Rhinorrhea                           | 38288 (28)    | 35677 (28.5)  | 2611 (22.4) | <.001 |
| Polypnea                             | 15868 (11.6)  | 12283 (9.8)   | 3585 (30.7) | <.001 |
| Vomit                                | 10123 (7.4)   | 8956 (7.2)    | 1167 (10)   | <.001 |
| Abdominal pain                       | 17338 (12.7)  | 15639 (12.5)  | 1699 (14.5) | <.001 |
| Conjunctivitis                       | 16941 (12.4)  | 15965 (12.8)  | 976 (8.4)   | <.001 |
| Cyanosis                             | 5917 (4.3)    | 4430 (3.5)    | 1487 (12.7) | <.001 |
| Sudden onset of symptoms             | 46723 (34.1)  | 42636 (34.1)  | 4087 (35)   | .04   |
| Contact with confirmed COVID-19 case | 70923 (51.8)  | 69506 (55.5)  | 1417 (12.1) | <.001 |
| Type of treatment received           |               |               |             |       |
| No antiviral / antibiotic            | 114143 (83.4) | 106792 (85.3) | 7351 (62.9) | <.001 |
| Antiviral only                       | 4044 (3)      | 2980 (2.4)    | 1064 (9.1)  |       |
| Antibiotic only                      | 13743 (10)    | 11788 (9.4)   | 1955 (16.7) |       |
| Antiviral + antibiotic               | 4925 (3.6)    | 3616 (2.9)    | 1309 (11.2) |       |
| Type of antiviral used               |               |               |             |       |
| Acyclovir                            | 36 (0.03)     | 32 (0.03)     | 4 (0.03)    | <.001 |
| Amantadine                           | 319 (0.2)     | 304 (0.2)     | 15 (0.1)    |       |
| Lopinavir-Ritonavir                  | 100 (0.1)     | 75 (0.1)      | 25 (0.2)    |       |
| Oseltamivir                          | 8414 (6.1)    | 6100 (4.9)    | 2314 (19.8) |       |
| Rimantadine                          | 61 (0.04)     | 54 (0.04)     | 7 (0.1)     |       |
| Zanamivir                            | 39 (0.03)     | 31 (0.02)     | 8(0.1)      |       |

Data expressed as frequency (%) or median (SD). P values were calculated by  $X^2$  or Student's t-test.

SD: Standard deviation, COPD: Chronic obstructive pulmonary disease, HIV/AIDS: Human immunodeficiency virus/acquired immune deficiency syndrome.

Supplementary Table 4. Survival analysis of laboratory-confirmed COVID-19 patients who underwent invasive mechanical ventilation (IMV) and were treated with antivirals and/or antibiotics in one of 197 accredited hospitals in Mexico City, between February 24, 2020 and September 14, 2020.

| <b>Group</b>                                                                                               | <b>Total</b> | <b>Deaths</b> | <b>Survivors</b> | <b>Survival</b> | <b>P value</b> |
|------------------------------------------------------------------------------------------------------------|--------------|---------------|------------------|-----------------|----------------|
| Patients receiving IMV                                                                                     | 6752         | 5346          | 1406             | 20.8%           | -              |
| Type of treatment                                                                                          |              |               |                  |                 |                |
| No antiviral/antibiotic                                                                                    | 3931         | 3240          | 691              | 17.6%           | Reference      |
| Antiviral only                                                                                             | 507          | 431           | 76               | 15.0%           | .001           |
| Antibiotic only                                                                                            | 1586         | 1087          | 499              | 31.5%           | <.001          |
| Antiviral + Antibiotic                                                                                     | 768          | 621           | 147              | 19.1%           | .3             |
| Type of antiviral or antibiotic only                                                                       |              |               |                  |                 |                |
| No antiviral/antibiotic                                                                                    | 3931         | 3240          | 691              | 17.6%           | Reference      |
| Acyclovir                                                                                                  | 2            | 2             | 0                | 0.0%            | .6             |
| Amantadine                                                                                                 | 7            | 7             | 0                | 0.0%            | .5             |
| Lopinavir-Ritonavir                                                                                        | 23           | 16            | 7                | 30.4%           | .1             |
| Oseltamivir                                                                                                | 1235         | 1019          | 216              | 17.5%           | .2             |
| Rimantadine                                                                                                | 3            | 3             | 0                | 0.0%            | .4             |
| Zanamivir                                                                                                  | 5            | 5             | 0                | 0.0%            | .9             |
| Antibiotic only                                                                                            | 1586         | 1087          | 499              | 31.5%           | <.001          |
| Treatment with oseltamivir                                                                                 |              |               |                  |                 |                |
| No antiviral/antibiotic                                                                                    | 3931         | 3240          | 691              | 17.6%           | Reference      |
| Oseltamivir                                                                                                | 488          | 413           | 75               | 15.4%           | .01            |
| Antibiotic only                                                                                            | 1586         | 1087          | 499              | 31.5%           | <.001          |
| Oseltamivir + Antibiotic                                                                                   | 747          | 606           | 141              | 18.9%           | .4             |
| Data expressed as number of patients or percentual of survival. P values were calculated by Log-Rank test. |              |               |                  |                 |                |



Supplementary Table 5. Survival analysis of laboratory-confirmed COVID-19 patients treated with antivirals and/or antibiotics and admitted to one of 125 accredited intensive care units (ICU) in Mexico City, between February 24, 2020 and September 14, 2020.

| <b>Group</b>                                                                                               | <b>Total</b> | <b>Deaths</b> | <b>Survivors</b> | <b>Survival</b> | <b>P value</b> |
|------------------------------------------------------------------------------------------------------------|--------------|---------------|------------------|-----------------|----------------|
| Patients admitted to ICU                                                                                   | 2425         | 1475          | 950              | 39.2%           | -              |
| Type of treatment                                                                                          |              |               |                  |                 |                |
| No antiviral/antibiotic                                                                                    | 908          | 494           | 414              | 45.6%           | Reference      |
| Antiviral only                                                                                             | 77           | 53            | 24               | 31.2%           | .00            |
| Antibiotic only                                                                                            | 1011         | 610           | 401              | 39.7%           | .02            |
| Antiviral + Antibiotic                                                                                     | 461          | 336           | 125              | 27.1%           | <.001          |
| Antiviral or antibiotic only                                                                               |              |               |                  |                 |                |
| No antiviral/antibiotic                                                                                    | 908          | 494           | 414              | 45.6%           | Reference      |
| Acyclovir                                                                                                  | 1            | 1             | 0                | 0.0%            | .08            |
| Amantadine                                                                                                 | 2            | 0             | 2                | 100.0%          | .20            |
| Lopinavir-Ritonavir                                                                                        | 29           | 17            | 12               | 41.4%           | .40            |
| Oseltamivir                                                                                                | 506          | 371           | 135              | 26.7%           | <.001          |
| Antibiotic only                                                                                            | 1011         | 610           | 401              | 39.7%           | .02            |
| Oseltamivir                                                                                                |              |               |                  |                 |                |
| No antiviral/antibiotic                                                                                    | 908          | 494           | 414              | 45.6%           | Reference      |
| Oseltamivir                                                                                                | 66           | 48            | 18               | 27.3%           | <.001          |
| Antibiotic only                                                                                            | 1011         | 610           | 401              | 39.7%           | .02            |
| Oseltamivir + Antibiotic                                                                                   | 440          | 323           | 117              | 26.6%           | <.001          |
| Data expressed as number of patients or percentual of survival. P values were calculated by Log-Rank test. |              |               |                  |                 |                |

Supplementary Table 6. Survival analysis of laboratory-confirmed COVID-19 non-pregnant/puerperal adults treated with antivirals and/or antibiotics in 379 accredited medical units in Mexico City, between February 24, 2020 and September 14, 2020.

| <b>Group</b>                                                                                               | <b>Total</b> | <b>Deaths</b> | <b>Survivors</b> | <b>Survival</b> | <b>P value</b> |
|------------------------------------------------------------------------------------------------------------|--------------|---------------|------------------|-----------------|----------------|
| Non-pregnant/puerperal adults                                                                              | 129837       | 11569         | 118268           | 91.1%           | -              |
| Type of treatment                                                                                          |              |               |                  |                 |                |
| No antiviral/antibiotic                                                                                    | 108213       | 7314          | 100899           | 93.2%           | Reference      |
| Antiviral only                                                                                             | 3990         | 1063          | 2927             | 73.4%           | <.001          |
| Antibiotic only                                                                                            | 13300        | 1945          | 11355            | 85.4%           | <.001          |
| Antiviral + Antibiotic                                                                                     | 4875         | 1306          | 3569             | 73.2%           | <.001          |
| Type of antiviral or antibiotic only                                                                       |              |               |                  |                 |                |
| No antiviral/antibiotic                                                                                    | 108213       | 7314          | 100899           | 93.2%           | Reference      |
| Acyclovir                                                                                                  | 36           | 4             | 32               | 88.9%           | .4             |
| Amantadine                                                                                                 | 308          | 15            | 293              | 95.1%           | .2             |
| Lopinavir-Ritonavir                                                                                        | 99           | 25            | 74               | 74.7%           | <.001          |
| Oseltamivir                                                                                                | 8324         | 2310          | 6014             | 72.2%           | <.001          |
| Rimantadine                                                                                                | 59           | 7             | 52               | 88.1%           | .1             |
| Zanamivir                                                                                                  | 39           | 8             | 31               | 79.5%           | .001           |
| Antibiotic only                                                                                            | 13300        | 1945          | 11355            | 85.4%           | <.001          |
| Treatment with oseltamivir                                                                                 |              |               |                  |                 |                |
| No antiviral / Antibiotic                                                                                  | 108213       | 7314          | 100899           | 93.2%           | Reference      |
| Oseltamivir                                                                                                | 3738         | 1032          | 2706             | 72.4%           | <.001          |
| Antibiotic only                                                                                            | 13300        | 1945          | 11355            | 85.4%           | <.001          |
| Oseltamivir + Antibiotic                                                                                   | 4586         | 1278          | 3308             | 72.1%           | <.001          |
| Data expressed as number of patients or percentual of survival. P values were calculated by Log-Rank test. |              |               |                  |                 |                |

Supplementary Table 7. Survival analysis of laboratory-confirmed COVID-19 children and adolescents treated with antivirals and/or antibiotics in 273 accredited medical units in Mexico City, between February 24, 2020 and September 14, 2020.

| <b>Group</b>                                                                                               | <b>Total</b> | <b>Deaths</b> | <b>Survivors</b> | <b>Survival</b> | <b>P value</b> |
|------------------------------------------------------------------------------------------------------------|--------------|---------------|------------------|-----------------|----------------|
| Children and adolescents                                                                                   | 5791         | 40            | 5751             | 99.31%          | -              |
| Type of treatment                                                                                          |              |               |                  |                 |                |
| No antiviral/antibiotic                                                                                    | 5336         | 28            | 5308             | 99.5%           | Reference      |
| Antiviral only                                                                                             | 40           | 0             | 40               | 100.0%          | .7             |
| Antibiotic only                                                                                            | 376          | 10            | 366              | 97.3%           | <.0001         |
| Antiviral + Antibiotic                                                                                     | 39           | 2             | 37               | 94.9%           | <.0001         |
| Type of antiviral or antibiotic only                                                                       |              |               |                  |                 |                |
| No antiviral/antibiotic                                                                                    | 5336         | 28            | 5308             | 99.5%           | Reference      |
| Amantadine                                                                                                 | 9            | 0             | 9                | 100.0%          | .8             |
| Lopinavir-Ritonavir                                                                                        | 1            | 0             | 1                | 100.0%          | .9             |
| Oseltamivir                                                                                                | 67           | 2             | 65               | 97.0%           | .008           |
| Rimantadine                                                                                                | 2            | 0             | 2                | 100.0%          | .9             |
| Antibiotic only                                                                                            | 376          | 10            | 366              | 97.3%           | <.001          |
| Treatment with oseltamivir                                                                                 |              |               |                  |                 |                |
| No antiviral/antibiotic                                                                                    | 5336         | 28            | 5308             | 99.5%           | Reference      |
| Oseltamivir                                                                                                | 36           | 0             | 36               | 100.0%          | .7             |
| Antibiotic only                                                                                            | 376          | 10            | 366              | 97.3%           | <.001          |
| Oseltamivir + Antibiotic                                                                                   | 31           | 2             | 29               | 93.5%           | <.001          |
| Data expressed as number of patients or percentual of survival. P values were calculated by Log-Rank test. |              |               |                  |                 |                |

Supplementary Table 8. Survival analysis of laboratory-confirmed COVID-19 pregnant women treated with antivirals and/or antibiotics in 177 accredited medical units in Mexico City, between February 24, 2020 and September 14, 2020.

| <b>Group</b>                                                                                               | <b>Total</b> | <b>Deaths</b> | <b>Survivors</b> | <b>Survival</b> | <b>P value</b> |
|------------------------------------------------------------------------------------------------------------|--------------|---------------|------------------|-----------------|----------------|
| Pregnancy                                                                                                  | 581          | 10            | 571              | 98.3%           | -              |
| Type of treatment                                                                                          |              |               |                  |                 |                |
| No antiviral / Antibiotic                                                                                  | 530          | 8             | 522              | 98.5%           | Reference      |
| Antiviral only                                                                                             | 12           | 1             | 11               | 91.7%           | .07            |
| Antibiotic only                                                                                            | 35           | 0             | 35               | 100.0%          | .9             |
| Antiviral + Antibiotic                                                                                     | 6            | 1             | 5                | 83.3%           | .004           |
| Type of antiviral                                                                                          |              |               |                  |                 |                |
| No antiviral / antibacterial agent                                                                         | 530          | 8             | 522              | 98.5%           | Reference      |
| Amantadine                                                                                                 | 2            | 0             | 2                | 100.0%          | .9             |
| Oseltamivir                                                                                                | 16           | 2             | 14               | 87.5%           | .001           |
| Antibacterial agent only                                                                                   | 35           | 0             | 35               | 100.0%          | .5             |
| Treatment with Oseltamivir                                                                                 |              |               |                  |                 |                |
| No antiviral / Antibiotic                                                                                  | 530          | 8             | 522              | 98.5%           | Reference      |
| Oseltamivir                                                                                                | 11           | 1             | 10               | 90.9%           | .05            |
| Antibiotic only                                                                                            | 35           | 0             | 35               | 100.0%          | .5             |
| Oseltamivir + Antibiotic                                                                                   | 5            | 1             | 4                | 80.0%           | .001           |
| Data expressed as number of patients or percentual of survival. P values were calculated by Log-Rank test. |              |               |                  |                 |                |

Supplementary Table 9. Unadjusted Cox regression models for mortality risk in laboratory-confirmed COVID-19 patients receiving antivirals, antibiotics, both, or none in accredited COVID-19 medical units in Mexico City.

|                                       | All patients      |       | Ambulatory              |       | Hospitalized      |       | Non-Critical      |       | Critical          |       |
|---------------------------------------|-------------------|-------|-------------------------|-------|-------------------|-------|-------------------|-------|-------------------|-------|
|                                       | HR (95%CI)        | P     | HR (95%CI)              | P     | HR (95%CI)        | P     | HR (95%CI)        | P     | HR (95%CI)        | P     |
| <b>Models for type of treatment</b>   |                   |       |                         |       |                   |       |                   |       |                   |       |
| No antiviral / antibiotic             | Reference         |       | Reference               |       | Reference         |       | Reference         |       | Reference         |       |
| Antiviral only                        | 4.43 (4.15-4.72)  | <.001 | 7.48 (6.29-8.90)        | <.001 | 1.19 (1.11-1.27)  | <.001 | 5.07 (4.67-5.52)  | <.001 | 1.21 (1.09-1.34)  | <.001 |
| Antibiotic only                       | 2.15 (2.05-2.27)  | <.001 | 1.09 (0.88-1.36)        | .4    | 0.79 (0.75-0.83)  | <.001 | 1.89 (1.75-2.03)  | <.001 | 0.63 (0.58-0.67)  | <.001 |
| Antiviral + antibiotic                | 4.31 (4.05-4.58)  | <.001 | 4.02 (3.09-5.22)        | <.001 | 0.90 (0.85-0.96)  | .001  | 4.65 (4.29-5.05)  | <.001 | 0.96 (0.88-1.05)  | .4    |
| <b>Models for type of antiviral</b>   |                   |       |                         |       |                   |       |                   |       |                   |       |
| No antiviral / antibiotic             | Reference         |       | Reference               |       | Reference         |       | Reference         |       | Reference         |       |
| Acyclovir                             | 1.71 (0.64-4.56)  | .3    | Not estimable           |       | 1.68 (0.63-4.48)  | .3    | 1.51 (0.38-6.07)  | .6    | 1.51 (0.38-6.03)  | .6    |
| Amantadine                            | 0.71 (0.43-1.17)  | .2    | 1.06 (0.34-3.29)        | .9    | 0.77 (0.44-1.36)  | .4    | 0.68 (0.34-1.36)  | .3    | 0.85 (0.40-1.78)  | .7    |
| Lopinavir-Ritonavir                   | 3.90 (2.61-5.83)  | <.001 | 12.96 (1.83-92.15)      | .01   | 0.57 (0.38-0.85)  | .006  | 2.69 (1.28-5.65)  | .009  | 0.57 (0.36-0.90)  | .02   |
| Oseltamivir                           | 4.57 (4.36-4.79)  | <.001 | 6.55 (5.63-7.63)        | <.001 | 1.01 (0.97-1.07)  | .6    | 5.12 (4.81-5.46)  | <.001 | 1.07 (0.99-1.14)  | .08   |
| Rimantadine                           | 1.74 (0.84-3.68)  | 0.1   | 2.02 (0.28-14.36)       | .5    | 1.19 (0.54-2.65)  | .7    | 1.83 (0.69-4.89)  | .2    | 1.77 (0.57-5.48)  | .3    |
| Zanamivir                             | 3.22 (1.61-6.44)  | .001  | 5.24 (0.73-37.23)       | .09   | 0.76 (0.36-1.60)  | .5    | 2.34 (0.76-7.27)  | .1    | 1.18 (0.49-2.85)  | .7    |
| Antibiotic only                       | 2.15 (2.05-2.27)  | <.001 | 1.09 (0.88-1.36)        | .4    | 0.79 (0.75-0.83)  | <.001 | 1.89 (1.75-2.03)  | <.001 | 0.63 (0.59-0.67)  | <.001 |
| <b>Models for Acyclovir</b>           |                   |       |                         |       |                   |       |                   |       |                   |       |
| No antiviral / antibiotic             | Reference         |       | Reference               |       | Reference         |       | Reference         |       | Reference         |       |
| Acyclovir only                        | 2.16 (0.30-15.31) | .4    | Not estimable           |       | 4.09 (0.58-29.05) | .2    | Not estimable     |       | 2.21 (0.31-15.68) | .4    |
| Antibiotic only                       | 2.15 (2.05-2.27)  | <.001 | 1.09 (0.88-1.36)        | .4    | 0.78 (0.75-0.83)  | <.001 | 1.89 (1.75-2.03)  | <.001 | 0.63 (0.58-0.67)  | <.001 |
| Acyclovir + antibiotic                | 1.60 (0.52-4.97)  | .4    | Not estimable           |       | 1.41 (0.45-4.37)  | .6    | 1.85 (0.46-7.38)  | .4    | 1.16 (0.16-8.24)  | .9    |
| <b>Models for Amantadine</b>          |                   |       |                         |       |                   |       |                   |       |                   |       |
| No antiviral / antibiotic             | Reference         |       | Reference               |       | Reference         |       | Reference         |       | Reference         |       |
| Amantadine only                       | 1.17 (0.68-2.02)  | .6    | 1.34 (0.34-5.38)        | .7    | 1.47 (0.82-2.66)  | .2    | 1.15 (0.55-2.42)  | .7    | 1.12 (0.50-2.50)  | .8    |
| Antibiotic only                       | 2.15 (2.05-2.27)  | <.001 | 1.09 (0.88-1.36)        | .4    | 0.79 (0.75-0.83)  | <.001 | 1.89 (1.75-2.03)  | <.001 | 0.63 (0.58-0.67)  | <.001 |
| Amantadine + antibiotic               | 0.19 (0.05-0.08)  | .02   | 0.74 (0.10-5.27)        | .8    | 0.13 (0.09-0.88)  | .04   | 0.18 (0.03-1.25)  | .08   | 0.34 (0.05-2.44)  | .3    |
| <b>Models for Lopinavir-Ritonavir</b> |                   |       |                         |       |                   |       |                   |       |                   |       |
| No antiviral / antibiotic             | Reference         |       | Reference               |       | Reference         |       | Reference         |       | Reference         |       |
| Lopinavir-Ritonavir only              | 2.79 (1.05-7.44)  | .04   | 4.24.97 (59.62-3029.30) | <.001 | 0.38 (0.14-1.00)  | .05   | 1.91 (0.27-13.63) | .5    | 0.36 (0.14-0.96)  | .04   |
| Antibiotic only                       | 2.15 (2.05-2.27)  | <.001 | 1.09 (0.88-1.36)        | .4    | 0.79 (0.75-0.83)  | <.001 | 1.89 (1.75-2.03)  | <.001 | 0.63 (0.58-0.67)  | <.001 |
| Lopinavir-Ritonavir + antibiotic      | 4.24 (2.73-6.58)  | <.001 | Not estimable           |       | 0.64 (0.41-0.99)  | .04   | 2.88 (1.29-6.42)  | .01   | 0.67 (0.39-1.14)  | .1    |

| <b>Models for Oseltamivir</b>                     |                  |       |                    |       |                  |       |                  |       |                  |       |
|---------------------------------------------------|------------------|-------|--------------------|-------|------------------|-------|------------------|-------|------------------|-------|
| No antiviral / antibiotic                         | Reference        |       | Reference          |       | Reference        |       | Reference        |       | Reference        |       |
| Oseltamivir only                                  | 4.62 (4.33-4.94) | <.001 | 8.00 (6.71-9.54)   | <.001 | 1.20 (1.12-1.29) | <.001 | 5.36 (4.92-5.83) | <.001 | 1.24 (1.12-1.37) | <.001 |
| Antibiotic only                                   | 2.15 (2.05-2.27) | <.001 | 1.09 (0.88-1.36)   | .4    | 0.79 (0.75-0.83) | <.001 | 1.89 (1.75-2.03) | <.001 | 0.63 (0.59-0.67) | <.001 |
| Oseltamivir + antibiotic                          | 4.53 (4.26-4.82) | <.001 | 4.56 (3.51-5.94)   | <.001 | 0.91 (0.86-0.97) | .003  | 4.92 (4.54-5.35) | <.001 | 0.97 (0.89-1.06) | .5    |
| <b>Models for Rimantadine</b>                     |                  |       |                    |       |                  |       |                  |       |                  |       |
| No antiviral / antibiotic                         | Reference        |       | Reference          |       | Reference        |       | Reference        |       | Reference        |       |
| Rimantadine only                                  | 2.75 (1.24-6.12) | .01   | 4.09 (0.58-29.09)  | .2    | 1.21 (0.50-2.90) | .7    | 2.54 (0.82-7.88) | .1    | 1.79 (0.58-5.55) | .3    |
| Antibiotic only                                   | 2.15 (2.05-2.27) | <.001 | 1.09 (0.88-1.36)   | .4    | 0.78 (0.75-0.83) | <.001 | 1.88 (1.75-2.03) | <.001 | 0.63 (0.58-0.67) | <.001 |
| Rimantadine + antibiotic                          | 0.55 (0.08-3.91) | .6    | Not estimable      |       | 1.14 (0.16-8.06) | .9    | 0.99 (0.14-7.08) | .9    | -                | -     |
| <b>Models for Zanamivir</b>                       |                  |       |                    |       |                  |       |                  |       |                  |       |
| No antiviral / antibiotic                         | Reference        |       | Reference          |       | Reference        |       | Reference        |       | Reference        |       |
| Zanamivir only                                    | 3.91 (1.75-8.69) | .001  | 10.31 (1.45-73.28) | .02   | 0.78 (0.33-1.88) | .6    | 1.40 (0.19-9.96) | .7    | 1.19 (0.49-2.86) | .7    |
| Antibiotic only                                   | 2.15 (2.05-2.28) | <.001 | 1.09 (0.88-1.36)   | .4    | 0.79 (0.75-0.83) | <.001 | 1.89 (1.75-2.03) | <.001 | 0.63 (0.49-2.86) | <.001 |
| Zanamivir + antibiotic                            | 2.11 (0.53-8.43) | .3    | Not estimable      |       | 0.72 (0.18-2.87) | .6    | 3.52 (0.88-14.1) | .07   | -                | -     |
| HR: Hazard ratio, 95%CI: 95% confidence intervals |                  |       |                    |       |                  |       |                  |       |                  |       |

Supplementary Table 10. Mortality risk in laboratory-confirmed COVID-19 patients who underwent invasive mechanical ventilation (IMV) and were treated with antivirals and/or antibiotics in one of 197 accredited hospitals in Mexico City, between February 24, 2020 and September 14, 2020

|                          | Unadjusted model |         | Adjusted model <sup>a</sup> |         |
|--------------------------|------------------|---------|-----------------------------|---------|
|                          | HR (95% CI)      | P value | HR (95% CI)                 | P value |
| <b>Type of treatment</b> |                  |         |                             |         |
| No antiviral/antibiotic  | Reference        |         | Reference                   |         |
| Antiviral only           | 1.18 (1.07-1.31) | .001    | 1.13 (1.02-1.25)            | .02     |
| Antibiotic only          | 0.62 (0.59-0.67) | <.001   | 0.64 (0.60-0.69)            | <.001   |
| Antiviral + antibiotic   | 0.95 (0.88-1.04) | .3      | 0.98 (0.90-1.07)            | .7      |
| <b>Type of antiviral</b> |                  |         |                             |         |
| No antiviral/antibiotic  | Reference        |         | Reference                   |         |
| Acyclovir                | 1.42 (0.36-5.68) | .6      | 1.96 (0.49-7.83)            | .3      |
| Amantadine               | 1.29 (0.61-2.70) | .5      | 1.29 (0.61-2.72)            | .5      |
| Lopinavir-Ritonavir      | 0.67 (0.41-1.09) | .1      | 0.68 (0.42-1.12)            | .1      |
| Oseltamivir              | 1.04 (0.97-1.12) | .3      | 1.04 (0.97-1.12)            | .2      |
| Rimantadine              | 1.66 (0.53-5.14) | .4      | 1.57 (0.50-4.90)            | .4      |
| Zanamivir                | 1.09 (0.48-2.64) | .8      | 0.87 (0.36-2.09)            | .8      |
| Antibiotic only          | 0.63 (0.59-0.67) | <.001   | 0.64 (0.60-0.69)            | <.001   |
| <b>Acyclovir</b>         |                  |         |                             |         |
| No antiviral/antibiotic  | Reference        |         | Reference                   |         |
| Acyclovir only           | 2.09 (0.29-14.9) | .5      | 2.85 (0.40-20.35)           | .3      |
| Antibiotic only          | 0.63 (0.58-0.67) | <.001   | 0.64 (0.60-0.69)            | <.001   |
| Acyclovir + antibiotic   | 1.09 (0.15-7.74) | .9      | 1.52 (0.21-10.78)           | .7      |
| <b>Amantadine</b>        |                  |         |                             |         |
| No antiviral/antibiotic  | Reference        |         | Reference                   |         |
| Amantadine only          | 1.51 (0.68-3.35) | .3      | 1.50 (0.67-3.35)            | .32     |
| Antibiotic only          | 0.63 (0.58-0.67) | <.001   | 0.64 (0.6-0.69)             | <.001   |
| Amantadine + antibiotic  | 0.71 (0.09-5.01) | .7      | 0.71 (0.10-5.09)            | .7      |

| <b>Lopinavir-Ritonavir</b>                                                                                                                                                                                                                                                        |                  |       |                  |       |
|-----------------------------------------------------------------------------------------------------------------------------------------------------------------------------------------------------------------------------------------------------------------------------------|------------------|-------|------------------|-------|
| No antiviral/antibiotic                                                                                                                                                                                                                                                           | Reference        |       | Reference        |       |
| Lopinavir-Ritonavir only                                                                                                                                                                                                                                                          | 0.59 (0.19-1.86) | .4    | 0.53 (0.17-1.63) | .3    |
| Antibiotic only                                                                                                                                                                                                                                                                   | 0.63 (0.58-0.67) | <.001 | 0.64 (0.60-0.69) | <.001 |
| Lopinavir-Ritonavir + antibiotic                                                                                                                                                                                                                                                  | 0.68 (0.39-1.17) | .2    | 0.74 (0.43-1.27) | .3    |
| <b>Oseltamivir</b>                                                                                                                                                                                                                                                                |                  |       |                  |       |
| No antiviral/antibiotic                                                                                                                                                                                                                                                           | Reference        |       | Reference        |       |
| Oseltamivir only                                                                                                                                                                                                                                                                  | 1.19 (1.07-1.31) | .001  | 1.14 (1.02-1.26) | .02   |
| Antibiotic only                                                                                                                                                                                                                                                                   | 0.63 (0.59-0.67) | <.001 | 0.64 (0.60-0.69) | <.001 |
| Oseltamivir + antibiotic                                                                                                                                                                                                                                                          | 0.96 (0.88-1.05) | .4    | 0.99 (0.91-1.08) | .8    |
| <b>Rimantadine</b>                                                                                                                                                                                                                                                                |                  |       |                  |       |
| No antiviral/antibiotic                                                                                                                                                                                                                                                           | Reference        |       | Reference        |       |
| Rimantadine only                                                                                                                                                                                                                                                                  | 1.68 (0.54-5.20) | .4    | 1.66 (0.53-5.17) | .4    |
| Antibiotic only                                                                                                                                                                                                                                                                   | 0.63 (0.58-0.67) | <.001 | 0.64 (0.60-0.69) | <.001 |
| <b>Zanamivir</b>                                                                                                                                                                                                                                                                  |                  |       |                  |       |
| No antiviral/antibiotic                                                                                                                                                                                                                                                           | Reference        |       | Reference        |       |
| Zanamivir only                                                                                                                                                                                                                                                                    | 1.10 (0.46-2.66) | .8    | 0.87 (0.36-2.10) | .8    |
| Antibiotic only                                                                                                                                                                                                                                                                   | 0.63 (0.58-0.67) | <.001 | 0.64 (0.60-0.69) | <.001 |
| HR: Hazard ratio, 95%CI: 95% confident interval.                                                                                                                                                                                                                                  |                  |       |                  |       |
| a: Models adjusted by: Sex (men), Age, Diabetes, Chronic obstructive pulmonary disease, Immunosuppression, Hypertension, Cardiovascular disease, Chronic kidney disease, Smoker, Unemployed, Irritability, Headache, Myalgias, Arthralgias, Rhinorrhea, Abdominal pain, Cyanosis. |                  |       |                  |       |



Supplementary Table 11. Mortality risk in laboratory-confirmed COVID-19 patients who were treated with antivirals and/or antibiotics and admitted to one of 125 accredited intensive care units (ICU) in Mexico City, between February 24, 2020 and September 14, 2020

|                            | Unadjusted model |         | Adjusted model <sup>a</sup> |         |
|----------------------------|------------------|---------|-----------------------------|---------|
|                            | HR (95% CI)      | P value | HR (95% CI)                 | P value |
| <b>Type of treatment</b>   |                  |         |                             |         |
| No antiviral/antibiotic    | Reference        |         | Reference                   |         |
| Antiviral only             | 1.60 (1.21-2.13) | .001    | 1.42 (1.07-1.89)            | .02     |
| Antibiotic only            | 1.15 (1.02-1.29) | .02     | 1.05 (0.93-1.19)            | .4      |
| Antiviral + antibiotic     | 1.71 (1.49-1.97) | <.001   | 1.49 (1.30-1.72)            | <.001   |
| <b>Type of antiviral</b>   |                  |         |                             |         |
| No antiviral/antibiotic    | Reference        |         | Reference                   |         |
| Acyclovir                  | 5.33 (0.75-37.9) | .09     | 8.38 (1.16-60.62)           | .04     |
| Amantadine                 | Not estimable    |         | Not estimable               |         |
| Lopinavir-Ritonavir        | 1.21 (0.75-1.97) | .44     | 0.99 (0.61-1.61)            | .9      |
| Oseltamivir                | 1.74 (1.52-1.96) | <.001   | 1.52 (1.33-1.74)            | <.001   |
| Antibiotic only            | 1.15 (1.02-1.29) | .02     | 1.05 (0.93-1.18)            | .4      |
| <b>Acyclovir</b>           |                  |         |                             |         |
| No antiviral/antibiotic    | Reference        |         | Reference                   |         |
| Acyclovir only             | 5.46 (0.77-38.9) | .09     | 10.21 (1.40-74.38)          | .02     |
| Antibiotic only            | 1.15 (1.02-1.29) | .02     | 1.05 (0.93-1.18)            | .4      |
| <b>Amantadine</b>          |                  |         |                             |         |
| No antiviral/antibiotic    | Reference        |         | Reference                   |         |
| Amantadine only            | Not estimable    |         | Not estimable               |         |
| Antibiotic only            | 1.15 (1.02-1.29) | .02     | 1.05 (0.93-1.18)            | .4      |
| Amantadine + antibiotic    | Not estimable    |         | Not estimable               |         |
| <b>Lopinavir-Ritonavir</b> |                  |         |                             |         |
| No antiviral/antibiotic    | Reference        |         | Reference                   |         |
| Lopinavir-Ritonavir only   | 0.74 (0.28-1.98) | .6      | 0.50 (0.19-1.35)            | .2      |

|                                                                                                                                                                                                                 |                  |       |                  |       |
|-----------------------------------------------------------------------------------------------------------------------------------------------------------------------------------------------------------------|------------------|-------|------------------|-------|
| Antibiotic only                                                                                                                                                                                                 | 1.15 (1.02-1.29) | .0    | 1.05 (0.93-1.18) | .5    |
| Lopinavir-Ritonavir + antibiotic                                                                                                                                                                                | 1.50 (0.89-2.61) | .2    | 1.32 (0.76-2.29) | .3    |
| <b>Oseltamivir</b>                                                                                                                                                                                              |                  |       |                  |       |
| No antiviral/antibiotic                                                                                                                                                                                         | Reference        |       | Reference        |       |
| Oseltamivir only                                                                                                                                                                                                | 1.79 (1.34-2.42) | <.001 | 1.64 (1.22-2.21) | <.001 |
| Antibiotic only                                                                                                                                                                                                 | 1.15 (1.02-1.29) | .02   | 1.05 (0.93-1.19) | .4    |
| Oseltamivir + antibiotic                                                                                                                                                                                        | 1.73 (1.51-1.99) | <.001 | 1.50 (1.30-1.73) | <.001 |
| HR: Hazard ratio, 95%CI: 95% confident interval.                                                                                                                                                                |                  |       |                  |       |
| a: Models adjusted by: Sex (men), Age, Diabetes, Chronic obstructive pulmonary disease, Hypertension, Obesity, Chronic kidney disease, Unemployed, Fever, Cough, Shortness of breath, Myalgias, Vomit, Cyanosis |                  |       |                  |       |

Supplementary Table 12. Mortality risk in laboratory-confirmed COVID-19 non-pregnant/puerperal adults treated with antivirals and/or antibiotics in 379 accredited medical units in Mexico City, between February 24, 2020 and September 14, 2020.

|                          | Unadjusted model |         | Adjusted model <sup>a</sup> |         |
|--------------------------|------------------|---------|-----------------------------|---------|
|                          | HR (95% CI)      | P value | HR (95% CI)                 | P value |
| <b>Type of treatment</b> |                  |         |                             |         |
| No antiviral/antibiotic  | Reference        |         | Reference                   |         |
| Antiviral only           | 4.34 (4.07-4.62) | <.001   | 1.80 (1.68-1.92)            | <.001   |
| Antibiotic only          | 2.18 (2.08-2.29) | <.001   | 1.19 (1.13-1.25)            | <.001   |
| Antiviral + antibiotic   | 4.31 (4.07-4.57) | <.001   | 1.64 (1.54-1.74)            | <.001   |
| <b>Type of antiviral</b> |                  |         |                             |         |
| No antiviral/antibiotic  | Reference        |         | Reference                   |         |
| Acyclovir                | 1.57 (0.59-4.18) | .4      | 1.40 (0.52-3.72)            | .5      |
| Amantadine               | 0.69 (0.42-1.16) | .2      | 0.72 (0.43-1.20)            | .2      |
| Lopinavir-Ritonavir      | 3.88 (2.62-5.74) | <.001   | 1.14 (0.77-1.69)            | .5      |
| Oseltamivir              | 4.52 (4.32-4.74) | <.001   | 1.73 (1.65-1.82)            | <.001   |
| Rimantadine              | 1.75 (0.83-3.67) | .1      | 1.47 (0.70-3.08)            | .3      |
| Zanamivir                | 3.04 (1.52-6.08) | .002    | 1.61 (0.81-3.22)            | .2      |
| Antibiotic only          | 2.18 (2.08-2.29) | <.001   | 1.19 (1.13-1.25)            | <.001   |
| <b>Acyclovir</b>         |                  |         |                             |         |
| No antiviral/antibiotic  | Reference        |         | Reference                   |         |
| Acyclovir only           | 2.09 (0.29-14.8) | .5      | 7.50 (1.06-53.27)           | .04     |
| Antibiotic only          | 2.18 (2.08-2.29) | <.001   | 1.16 (1.10-1.22)            | <.001   |
| Acyclovir + antibiotic   | 1.45 (0.46-4.48) | .5      | 1.11 (0.36-3.45)            | .9      |
| <b>Amantadine</b>        |                  |         |                             |         |
| No antiviral/antibiotic  | Reference        |         | Reference                   |         |
| Amantadine only          | 1.15 (0.67-1.98) | .6      | 1.75 (1.02-3.02)            | .04     |
| Antibiotic only          | 2.18 (2.08-2.29) | <.001   | 1.16 (1.10-1.22)            | <.001   |
| Amantadine + antibiotic  | 0.19 (0.05-0.78) | .02     | 0.15 (0.04-0.59)            | .007    |

| <b>Lopinavir-Ritonavir</b>                                                                                                                                                                                                                                                                                                                                                                   |                  |       |                  |       |
|----------------------------------------------------------------------------------------------------------------------------------------------------------------------------------------------------------------------------------------------------------------------------------------------------------------------------------------------------------------------------------------------|------------------|-------|------------------|-------|
| No antiviral/antibiotic                                                                                                                                                                                                                                                                                                                                                                      | Reference        |       | Reference        |       |
| Lopinavir-Ritonavir only                                                                                                                                                                                                                                                                                                                                                                     | 3.27 (1.36-7.88) | .008  | 0.83 (0.34-1.99) | .7    |
| Antibiotic only                                                                                                                                                                                                                                                                                                                                                                              | 2.18 (2.08-2.29) | <.001 | 1.16 (1.11-1.22) | <.001 |
| Lopinavir-Ritonavir + antibiotic                                                                                                                                                                                                                                                                                                                                                             | 4.06 (2.62-6.29) | <.001 | 1.18 (0.76-1.83) | .5    |
| <b>Oseltamivir</b>                                                                                                                                                                                                                                                                                                                                                                           |                  |       |                  |       |
| No antiviral/antibiotic                                                                                                                                                                                                                                                                                                                                                                      | Reference        |       | Reference        |       |
| Oseltamivir only                                                                                                                                                                                                                                                                                                                                                                             | 4.52 (4.24-4.83) | <.001 | 1.81 (1.69-1.93) | <.001 |
| Antibiotic only                                                                                                                                                                                                                                                                                                                                                                              | 2.18 (2.08-2.29) | <.001 | 1.19 (1.13-1.25) | <.001 |
| Oseltamivir + antibiotic                                                                                                                                                                                                                                                                                                                                                                     | 4.52 (4.26-4.79) | <.001 | 1.68 (1.58-1.78) | <.001 |
| <b>Rimantadine</b>                                                                                                                                                                                                                                                                                                                                                                           |                  |       |                  |       |
| No antiviral/antibiotic                                                                                                                                                                                                                                                                                                                                                                      | Reference        |       | Reference        |       |
| Rimantadine only                                                                                                                                                                                                                                                                                                                                                                             | 2.71 (1.22-6.03) | .02   | 2.02 (0.91-4.50) | .1    |
| Antibiotic only                                                                                                                                                                                                                                                                                                                                                                              | 2.18 (2.08-2.29) | <.001 | 1.16 (1.11-1.22) | <.001 |
| Rimantadine + antibiotic                                                                                                                                                                                                                                                                                                                                                                     | 0.56 (0.08-3.97) | .6    | 0.53 (0.07-3.77) | .5    |
| <b>Zanamivir</b>                                                                                                                                                                                                                                                                                                                                                                             |                  |       |                  |       |
| No antiviral/antibiotic                                                                                                                                                                                                                                                                                                                                                                      | Reference        |       | Reference        |       |
| Zanamivir only                                                                                                                                                                                                                                                                                                                                                                               | 3.79 (1.71-8.45) | .001  | 2.02 (0.91-4.50) | .1    |
| Antibiotic only                                                                                                                                                                                                                                                                                                                                                                              | 2.18 (2.08-2.29) | <.001 | 1.16 (1.11-1.22) | <.001 |
| Zanamivir + antibiotic                                                                                                                                                                                                                                                                                                                                                                       | 1.90 (0.48-7.62) | .36   | 0.97 (0.24-3.86) | .9    |
| HR: Hazard ratio, 95%CI: 95% confident interval.                                                                                                                                                                                                                                                                                                                                             |                  |       |                  |       |
| a: Models adjusted by: Sex (men), Age, Diabetes, Chronic obstructive pulmonary disease, Immunosuppression, Hypertension, Human immunodeficiency virus/acquired immune deficiency syndrome, Obesity, Cardiovascular disease, Chronic kidney disease, Smoker, Unemployed, Fever, Cough, Shortness of breath, Irritability, Chest pain, Myalgias, Arthralgias, Polypnea, Vomit, Abdominal pain. |                  |       |                  |       |

Supplementary Table 13. Mortality risk in laboratory-confirmed COVID-19 children and adolescents treated with antivirals and/or antibiotics in 273 accredited medical units in Mexico City, between February 24, 2020 and September 14, 2020

|                                                                             | Unadjusted model   |         | Adjusted model <sup>a</sup> |         |
|-----------------------------------------------------------------------------|--------------------|---------|-----------------------------|---------|
|                                                                             | HR (95% CI)        | P value | HR (95% CI)                 | P value |
| <b>Type of treatment</b>                                                    |                    |         |                             |         |
| No antiviral/antibiotic                                                     | Reference          |         | Reference                   |         |
| Antiviral only                                                              | Not estimable      |         | Not estimable               |         |
| Antibiotic only                                                             | 5.01 (2.43-10.32)  | <.001   | 4.22 (2.01-8.86)            | <.001   |
| Antiviral + antibiotic                                                      | 9.68 (2.31-40.62)  | .002    | 6.54 (1.44-29.63)           | .01     |
| <b>Type of antiviral</b>                                                    |                    |         |                             |         |
| No antiviral/antibiotic                                                     | Reference          |         | Reference                   |         |
| Amantadine                                                                  | Not estimable      |         | Not estimable               |         |
| Lopinavir-Ritonavir                                                         | Not estimable      |         | Not estimable               |         |
| Oseltamivir                                                                 | 5.66 (1.35-23.73)  | .02     | 4.22 (0.94-18.99)           | .06     |
| Rimantadine                                                                 | Not estimable      |         | Not estimable               |         |
| Antibiotic only                                                             | 5.01 (2.43-10.31)  | <.001   | 4.20 (2.00-8.83)            | <.001   |
| <b>Oseltamivir</b>                                                          |                    |         |                             |         |
| No antiviral/antibiotic                                                     | Reference          |         | Reference                   |         |
| Oseltamivir only                                                            | Not estimable      |         | Not estimable               |         |
| Antibiotic only                                                             | 5.01 (2.43-10.3)   | <.001   | 4.20 (2.00-8.82)            | <.001   |
| Oseltamivir + antibiotic                                                    | 12.10 (2.89-50.84) | .001    | 7.95 (1.70-37.21)           | .01     |
| HR: Hazard ratio, 95%CI: 95% confident interval.                            |                    |         |                             |         |
| a: Models adjusted by: Diabetes, Immunosuppression, Chronic kidney disease. |                    |         |                             |         |

Supplementary Table 14. Mortality risk in laboratory-confirmed COVID-19 pregnant women treated with antivirals and/or antibiotics in 117 accredited medical units in Mexico City, between February 24, 2020 and September 14, 2020.

|                                                  | <b>Unadjusted model</b> |                |
|--------------------------------------------------|-------------------------|----------------|
|                                                  | <b>HR (95% CI)</b>      | <b>P value</b> |
| <b>Type of treatment</b>                         |                         |                |
| No antiviral/antibiotic                          | Reference               |                |
| Antiviral only                                   | 5.51 (0.69-44.06)       | .1             |
| Antibiotic only                                  | Not estimable           |                |
| Antiviral + antibiotic                           | 11.14 (1.39-89.07)      | .02            |
| <b>Type of antiviral</b>                         |                         |                |
| No antiviral/antibiotic                          | Reference               |                |
| Amantadine                                       | Not estimable           |                |
| Oseltamivir                                      | 8.35 (1.77-39.30)       | .007           |
| Antibiotic only                                  | Not estimable           |                |
| <b>Oseltamivir</b>                               |                         |                |
| No antiviral/antibiotic                          | Reference               |                |
| Oseltamivir only                                 | 6.04 (0.76-48.26)       | .09            |
| Antibiotic only                                  | Not estimable           |                |
| Oseltamivir + antibiotic                         | 13.52 (1.69-108.10)     | .01            |
| HR: Hazard ratio, 95%CI: 95% confident interval. |                         |                |

Supplementary Table 15. E-Values for Cox regression models in the general population, ambulatory, hospitalized, non-critical, and critical COVID-19 patients.

|                                          | All patients | Ambulatory  | Hospitalized | Non-Critical | Critical    |
|------------------------------------------|--------------|-------------|--------------|--------------|-------------|
| <b>Models for type of treatment used</b> |              |             |              |              |             |
| Antiviral only                           | 2.83 (2.60)  | 8.87 (7.34) | -            | 3.48 (3.12)  | -           |
| antibiotic only                          | 1.51 (1.37)  | 2.12 (1.5)  | 1.77 (1.60)  | -            | 2.35 (2.12) |
| Antiviral + antibiotic                   | 2.52 (2.30)  | 3.23 (2.3)  | 1.43 (1.21)  | 2.64 (2.34)  | -           |
| <b>Models for type of antiviral used</b> |              |             |              |              |             |
| Acyclovir                                | -            | -           | 4.94 (1.21)  | -            | -           |
| Amantadine                               | -            | -           | -            | -            | -           |
| Lopinavir-Ritonavir                      | -            | -           | 2.78 (1.5)   | -            | -           |
| Oseltamivir                              | 2.71 (2.54)  | 6.50 (5.47) | -            | 3.08 (2.83)  | -           |
| Rimantadine                              | -            | -           | -            | -            | -           |
| Zanamivir                                | -            | -           | -            | -            | -           |
| Antibiotic only                          | 1.54 (1.37)  | 2.12 (1.46) | 1.77 (1.60)  | -            | 2.30 (2.12) |
| <b>Models for Acyclovir</b>              |              |             |              |              |             |
| Acyclovir only                           | 15.68 (1.54) | -           | 17.45 (1.83) | -            | -           |
| antibiotic only                          | 1.46 (1.28)  | 2.17 (1.5)  | 1.74 (1.60)  | -            | 2.35 (2.12) |
| Acyclovir + antibiotic                   | -            | -           | -            | -            | -           |
| <b>Models for Amantadine</b>             |              |             |              |              |             |
| Amantadine only                          | 2.96 (1.21)  | -           | -            | -            | -           |
| antibiotic only                          | 1.46 (1.28)  | 2.17 (1.50) | 1.74 (1.60)  | -            | 2.35 (2.12) |
| Amantadine + antibiotic                  | 12.81 (2.78) | -           | -            | 14.87 (1.46) | -           |
| <b>Models for Lopinavir-Ritonavir</b>    |              |             |              |              |             |
| Lopinavir-Ritonavir only                 | -            | 113 (15.22) | -            | -            | -           |
| antibiotic only                          | 1.46 (1.28)  | 2.17 (1.50) | 1.74 (1.60)  | -            | 2.35 (2.12) |
| Lopinavir-Ritonavir + antibiotic         | -            | -           | -            | -            | -           |
| <b>Models for Oseltamivir</b>            |              |             |              |              |             |
| Oseltamivir only                         | 2.83 (2.60)  | 9.05 (7.48) | -            | 3.52 (3.17)  | -           |
| antibiotic only                          | 1.51 (1.37)  | 2.12 (1.50) | 1.74 (1.60)  | -            | 2.35 (2.12) |
| Oseltamivir + antibiotic                 | 2.60 (2.39)  | 3.62 (2.69) | 1.39 (1.16)  | 2.75 (2.47)  | -           |
| <b>Models for Rimantadine</b>            |              |             |              |              |             |
| Rimantadine only                         | -            | -           | -            | -            | -           |
| antibiotic only                          | 1.46 (1.28)  | 2.17 (1.50) | 1.74 (1.60)  | -            | 2.35 (2.12) |

|                                                                                            |             |             |             |   |             |
|--------------------------------------------------------------------------------------------|-------------|-------------|-------------|---|-------------|
| Rimantadine + antibiotic                                                                   | -           | -           | -           | - | -           |
| <b>Models for Zanamivir</b>                                                                |             |             |             |   |             |
| Zanamivir only                                                                             | -           | -           | -           | - | -           |
| antibiotic only                                                                            | 1.46 (1.28) | 2.17 (1.50) | 1.74 (1.60) | - | 2.35 (2.12) |
| Zanamivir + antibiotic                                                                     | -           | -           | -           | - | -           |
| Data presented as E-value for point estimate (E-value for lower-limit confidence interval) |             |             |             |   |             |



Supplementary Table 16. E-Values for Cox regression models in the non-pregnant/puerperal adults, children and adolescents, VMI and ICU COVID-19 patients.

|                                                                                            | IMV         | ICU          | Non-pregnant/puerperal adults | Children and adolescents |
|--------------------------------------------------------------------------------------------|-------------|--------------|-------------------------------|--------------------------|
| <b>Models for type of treatment used</b>                                                   |             |              |                               |                          |
| Antiviral only                                                                             | 1.51 (1.16) | 2.19 (1.34)  | 3.00 (2.75)                   | -                        |
| Antibiotic only                                                                            | 2.50 (2.26) | -            | 1.67 (1.51)                   | 7.91 (3.43)              |
| Antiviral + antibiotic                                                                     | -           | 2.34 (1.92)  | 2.66 (2.45)                   | 12.56 (2.24)             |
| <b>Models for type of antiviral used</b>                                                   |             |              |                               |                          |
| Acyclovir                                                                                  | -           | 16.24 (1.59) | -                             | -                        |
| Amantadine                                                                                 | -           | -            | -                             | -                        |
| Lopinavir-Ritonavir                                                                        | -           | -            | -                             | -                        |
| Oseltamivir                                                                                | -           | 2.41 (1.99)  | 2.85 (2.69)                   | -                        |
| Rimantadine                                                                                | -           | -            | -                             | -                        |
| Zanamivir                                                                                  | -           | -            | -                             | -                        |
| Antibiotic only                                                                            | 2.50 (2.26) | -            | 1.67 (1.51)                   | 7.87 (3.41)              |
| <b>Models for Acyclovir</b>                                                                |             |              |                               |                          |
| Acyclovir only                                                                             | -           | 19.91 (2.15) | 14.48 (1.31)                  | -                        |
| Antibiotic only                                                                            | 2.50 (2.26) | -            | 1.59 (1.43)                   | -                        |
| Acyclovir + antibiotic                                                                     | -           | -            | -                             | -                        |
| <b>Models for Amantadine</b>                                                               |             |              |                               |                          |
| Amantadine only                                                                            | -           | -            | 2.9 (1.16)                    | -                        |
| Antibiotic only                                                                            | 2.50 (2.26) | -            | 1.59 (1.43)                   | -                        |
| Amantadine + antibiotic                                                                    | -           | -            | -                             | -                        |
| <b>Models for Lopinavir-Ritonavir</b>                                                      |             |              |                               |                          |
| Lopinavir-Ritonavir only                                                                   | -           | -            | -                             | -                        |
| Antibiotic only                                                                            | 2.50 (2.26) | -            | 1.59 (1.43)                   | -                        |
| Lopinavir-Ritonavir + antibiotic                                                           | -           | -            | -                             | -                        |
| <b>Models for Oseltamivir</b>                                                              |             |              |                               |                          |
| Oseltamivir only                                                                           | 1.54 (1.16) | 2.66 (1.74)  | 3.02 (2.77)                   | -                        |
| Antibiotic only                                                                            | 2.50 (2.26) | -            | 1.67 (1.51)                   | 7.87 (3.41)              |
| Oseltamivir + antibiotic                                                                   | -           | 2.37 (1.92)  | 2.75 (2.54)                   | 15.38 (2.79)             |
| Data presented as E-value for point estimate (E-value for lower-limit confidence interval) |             |              |                               |                          |

Supplementary Tabla 17. Baseline characteristics of 903 patients with data of timing of initiation of antiviral treatment with laboratory-confirmed COVID-19, who received medical attention in one of 154 accredited medical units in Mexico City.

|                                           | <b>Total<br/>n=903</b> | <b>Acyclovir<br/>n=26</b> | <b>Amantadine<br/>n=131</b> | <b>Lopinavir-<br/>Ritonavir<br/>n=9</b> | <b>Oseltamivir<br/>n=702</b> | <b>Rimantadine<br/>n=24</b> | <b>Zinamivir<br/>n=11</b> |
|-------------------------------------------|------------------------|---------------------------|-----------------------------|-----------------------------------------|------------------------------|-----------------------------|---------------------------|
| <b>Sex</b>                                |                        |                           |                             |                                         |                              |                             |                           |
| Women                                     | 403 (44.6)             | 14 (53.8)                 | 72 (55)                     | 2 (22.2)                                | 294 (41.9)                   | 13 (54.2)                   | 8 (72.7)                  |
| Men                                       | 500 (55.4)             | 12 (46.2)                 | 59 (45)                     | 7 (77.8)                                | 408 (58.1)                   | 11 (45.8)                   | 3 (27.3)                  |
| <b>Age, mean (SD)</b>                     | 46.7<br>(14.8)         | 44.5<br>(13.9)            | 42.3 (14.3)                 | 51 (11.1)                               | 47.8 (14.8)                  | 42.6 (13.9)                 | 40 (13.9)                 |
| <b>Age categories</b>                     |                        |                           |                             |                                         |                              |                             |                           |
| 0-19 years                                | 17 (1.9)               | 0 (0)                     | 5 (3.8)                     | 0 (0)                                   | 11 (1.6)                     | 1 (4.2)                     | 0 (0)                     |
| 20-29 years                               | 88 (9.7)               | 5 (19.2)                  | 18 (13.7)                   | 0 (0)                                   | 62 (8.8)                     | 1 (4.2)                     | 2 (18.2)                  |
| 30-39 years                               | 204 (22.6)             | 5 (19.2)                  | 40 (30.5)                   | 0 (0)                                   | 147 (20.9)                   | 8 (33.3)                    | 4 (36.4)                  |
| 40-49 years                               | 220 (24.4)             | 7 (26.9)                  | 26 (19.8)                   | 5 (55.6)                                | 170 (24.2)                   | 10 (41.7)                   | 2 (18.2)                  |
| 50-59 years                               | 192(21.3)              | 4 (15.4)                  | 25 (19.1)                   | 2 (22.2)                                | 157 (22.4)                   | 2 (8.3)                     | 2 (18.2)                  |
| 60-69 years                               | 118 (13.1)             | 5 (19.2)                  | 11 (8.4)                    | 1 (11.1)                                | 100 (14.2)                   | 0 (0)                       | 1 (9.1)                   |
| 70-79 years                               | 51 (5.6)               | 0 (0)                     | 5 (3.8)                     | 1 (11.1)                                | 43 (6.1)                     | 2 (8.3)                     | 0 (0)                     |
| 80-89 years                               | 10 (1.1)               | 0 (0)                     | 1 (0.8)                     | 0 (0)                                   | 9 (1.3)                      | 0 (0)                       | 0 (0)                     |
| 90-99 years                               | 3 (0.3)                | 0 (0)                     | 0 (0)                       | 0 (0)                                   | 3 (0.4)                      | 0 (0)                       | 0 (0)                     |
| Indigenous self-identification            | 10 (1.1)               | 0 (0)                     | 1 (0.8)                     | 0 (0)                                   | 7 (1)                        | 0 (0)                       | 2 (18.2)                  |
| <b>Occupation</b>                         |                        |                           |                             |                                         |                              |                             |                           |
| Technical services                        | 29 (3.2)               | 0 (0)                     | 3 (2.3)                     | 0 (0)                                   | 25 (3.6)                     | 0 (0)                       | 1 (9.1)                   |
| Education                                 | 34 (3.8)               | 0 (0)                     | 8 (6.1)                     | 0 (0)                                   | 25 (3.6)                     | 1 (4.2)                     | 0 (0)                     |
| Healthcare                                | 117 (13)               | 2 (7.7)                   | 12 (9.2)                    | 2 (22.2)                                | 97 (13.8)                    | 4 (16.7)                    | 0 (0)                     |
| Agricultural activities                   | 2 (0.2)                | 0 (0)                     | 0 (0)                       | 0 (0.0)                                 | 2 (0.3)                      | 0 (0)                       | 0 (0)                     |
| Commerce                                  | 327 (36.2)             | 12 (46.2)                 | 53 (40.5)                   | 0 (0.0)                                 | 251 (35.8)                   | 8 (33.3)                    | 3 (27.3)                  |
| Other                                     | 197 (21.8)             | 5 (19.2)                  | 31 (23.7)                   | 6 (66.7)                                | 149 (21.2)                   | 5 (20.8)                    | 1 (9.1)                   |
| Unemployed                                | 17 (1.9)               | 0 (0)                     | 0 (0)                       | 1 (11.1)                                | 15 (2.1)                     | 1 (4.2)                     | 0 (0)                     |
| Stay-at-home                              | 180 (19.9)             | 7 (26.9)                  | 24 (18.3)                   | 0 (0)                                   | 138 (19.7)                   | 5 (20.8)                    | 6 (54.5)                  |
| Last-season flu vaccination               | 222 (24.6)             | 5 (19.2)                  | 38 (29)                     | 1 (11.1)                                | 173 (24.6)                   | 4 (16.7)                    | 1 (9.1)                   |
| <b>Special populations</b>                |                        |                           |                             |                                         |                              |                             |                           |
| Children and adolescents (<18 years)      | 11 (1.2)               | 0 (0.0)                   | 3 (2.3)                     | 0 (0)                                   | 7 (1)                        | 1 (4.2)                     | 0 (0)                     |
| Age, mean (SD)                            | 11.6 (5.5)             | -                         | 11 (7.8)                    | -                                       | 11.9 (5.5)                   | 12                          | -                         |
| Last-season flu vaccination               | 2 (18.2)               | 0 (0)                     | 0 (0)                       | 0 (0)                                   | 2 (28.6)                     | 0 (0)                       | 0 (0)                     |
| Non-pregnant/puerperal adults (≥18 years) | 890 (98.6)             | 26 (100)                  | 128 (97.7)                  | 9 (100)                                 | 693 (98.7)                   | 23 (95.8)                   | 11 (100)                  |

|                             |                |                |             |           |             |             |           |
|-----------------------------|----------------|----------------|-------------|-----------|-------------|-------------|-----------|
| Age, mean (SD)              | 47.2<br>(14.3) | 44.5<br>(13.9) | 42.9 (13.6) | 51 (11.1) | 48.2 (14.2) | 43.9 (12.6) | 40 (12.9) |
| Last-season flu vaccination | 220 (24.7)     | 5 (19.2)       | 38 (29.7)   | 1 (11.1)  | 171 (24.7)  | 4 (17.4)    | 1 (9.1)   |
| Comorbidities               |                |                |             |           |             |             |           |
| Diabetes                    | 138 (15.3)     | 0 (0)          | 10 (7.6)    | 2 (22.2)  | 123 (17.5)  | 3 (12.5)    | 0 (0)     |
| COPD                        | 12 (1.3)       | 0 (0)          | 2 (1.5)     | 0 (0)     | 10 (1.4)    | 0 (0)       | 0 (0)     |
| Asthma                      | 23 (2.5)       | 1 (3.8)        | 3 (2.3)     | 1 (11.1)  | 18 (2.6)    | 0 (0)       | 0 (0)     |
| Immunosuppression           | 14 (1.6)       | 0 (0)          | 5 (3.8)     | 0 (0)     | 9 (1.3)     | 0 (0)       | 0 (0)     |
| Hypertension                | 166 (18.4)     | 4 (15.4)       | 11 (8.4)    | 0 (0)     | 147 (20.9)  | 3 (12.5)    | 1 (9.1)   |
| HIV/AIDS                    | 2 (0.2)        | 0 (0)          | 0 (0)       | 0 (0)     | 2 (0.3)     | 0 (0)       | 0 (0)     |
| Cardiovascular disease      | 27 (1.6)       | 2 (7.7)        | 1 (0.8)     | 1 (11.1)  | 23 (3.3)    | 0 (0)       | 0 (0)     |
| Obesity                     | 241 (3)        | 9 (34.6)       | 41 (31.3)   | 2 (22.2)  | 182 (25.9)  | 3 (12.5)    | 4 (36.4)  |
| Chronic kidney disease      | 17 (26.7)      | 0 (0)          | 0 (0)       | 0 (0)     | 17 (2.4)    | 0 (0)       | 0 (0)     |
| Smoker                      | 107 (1.9)      | 0 (0)          | 20 (15.3)   | 1 (11.1)  | 82 (11.7)   | 2 (8.3)     | 2 (18.2)  |
| Type of medical attention   |                |                |             |           |             |             |           |
| Ambulatory                  | 675 (74.8)     | 26 (100)       | 127 (96.9)  | 0 (0)     | 491 (69.9)  | 22 (91.7)   | 9 (81.8)  |
| Hospitalization             | 228 (25.2)     | 0 (0)          | 4 (3.1)     | 9 (10)    | 211 (30.1)  | 2 (8.3)     | 2 (18.2)  |
| Severity of the disease     |                |                |             |           |             |             |           |
| Non-critical                | 833 (92.2)     | 26 (100)       | 130 (99.2)  | 4 (44.4)  | 638 (90.9)  | 24 (100)    | 11 (100)  |
| Critical                    | 70 (7.8)       | 0 (0)          | 1 (0.8)     | 5 (55.6)  | 64 (9.1)    | 0 (0)       | 0 (0)     |
| Baseline symptoms           |                |                |             |           |             |             |           |
| Fever                       | 643 (71.2)     | 20 (76.9)      | 82 (62.6)   | 9 (100)   | 511 (72.8)  | 12 (50)     | 9 (81.8)  |
| Cough                       | 675 (74.8)     | 17 (65.4)      | 98 (74.8)   | 7 (77.8)  | 527 (75.1)  | 17 (70.8)   | 9 (81.8)  |
| Sore throat                 | 434 (48.1)     | 10 (38.5)      | 63 (48.1)   | 3 (33.3)  | 338 (48.1)  | 14 (58.3)   | 6 (54.5)  |
| Shortness of breath         | 402 (44.5)     | 11 (42.3)      | 36 (27.5)   | 6 (66.7)  | 335 (47.7)  | 9 (37.5)    | 5 (45.5)  |
| Irritability                | 199 (22)       | 5 (19.2)       | 23 (17.6)   | 1 (11.1)  | 158 (22.5)  | 6 (25)      | 6 (54.5)  |
| Diarrhea                    | 285 (31.6)     | 9 (34.6)       | 39 (29.8)   | 1 (11.1)  | 226 (32.2)  | 4 (16.7)    | 6 (54.5)  |
| Chest pain                  | 330 (36.5)     | 8 (30.8)       | 37 (28.2)   | 3 (33.3)  | 266 (37.9)  | 9 (37.5)    | 7 (63.6)  |
| Chills                      | 434 (48.1)     | 12 (46.2)      | 60 (45.8)   | 3 (33.3)  | 342 (48.7)  | 11 (45.8)   | 6 (54.5)  |
| Headache                    | 645 (71.4)     | 19 (73.1)      | 93 (71)     | 7 (77.8)  | 502 (71.5)  | 15 (62.5)   | 9 (81.8)  |
| Myalgias                    | 590 (65.3)     | 20 (76.9)      | 78 (59.5)   | 5 (55.6)  | 464 (66.1)  | 15 (62.5)   | 8 (72.7)  |
| Arthralgias                 | 552 (61.1)     | 16 (61.5)      | 73 (55.7)   | 5 (55.6)  | 436 (62.1)  | 16 (66.7)   | 6 (54.5)  |
| Abrupt deterioration        | 556 (61.6)     | 15 (57.7)      | 77 (58.8)   | 6 (66.7)  | 440 (62.7)  | 12 (50)     | 6 (54.5)  |
| Rhinorrhea                  | 294 (32.6)     | 5 (19.2)       | 45 (34.4)   | 1 (11.1)  | 229 (32.6)  | 10 (41.7)   | 4 (36.4)  |
| Polypnea                    | 171 (18.9)     | 3 (11.5)       | 22 (16.8)   | 1 (11.1)  | 141 (20.1)  | 2 (8.3)     | 2 (18.2)  |
| Vomit                       | 106 (11.7)     | 2 (7.7)        | 9 (6.9)     | 1 (11.1)  | 90 (12.8)   | 3 (12.5)    | 1 (9.1)   |
| Abdominal pain              | 153 (16.9)     | 1 (3.8)        | 17 (13)     | 2 (22.2)  | 127 (18.1)  | 3 (12.5)    | 3 (27.3)  |
| Conjunctivitis              | 157 (17.4)     | 4 (15.4)       | 20 (15.3)   | 1 (11.1)  | 123 (17.5)  | 5 (20.8)    | 4 (36.4)  |
| Cyanosis                    | 67 (7.4)       | 1 (3.8)        | 7 (5.3)     | 1 (11.1)  | 56 (8)      | 1 (4.2)     | 1 (9.1)   |

|                                |            |           |            |          |            |           |           |
|--------------------------------|------------|-----------|------------|----------|------------|-----------|-----------|
| Sudden onset of symptoms       | 349 (38.6) | 7 (26.9)  | 47 (35.9)  | 5 (55.6) | 274 (3)    | 12 (50)   | 4 (36.4)  |
| Concomitant use of antibiotics | 566 (62.7) | 22 (84.6) | 84 (64.1)  | 5 (55.6) | 434 (61.8) | 15 (62.5) | 6 (54.5)  |
| Timing of antiviral treatment  |            |           |            |          |            |           |           |
| Before medical attention       | 783 (86.7) | 19 (73.1) | 121 (92.4) | 7 (77.8) | 603 (85.9) | 23 (95.8) | 10 (90.9) |
| After medical attention        | 120 (13.3) | 7 (26.9)  | 10 (7.6)   | 2 (22.2) | 99 (14.1)  | 1 (4.2)   | 1 (9.1)   |
| ≤2 days after symptom onset    | 579 (64.2) | 8 (30.8)  | 99 (75.6)  | 1 (11.1) | 448 (63.9) | 16 (66.7) | 7 (63.6)  |
| >2 days after symptom onset    | 323 (35.8) | 18 (69.2) | 32 (24.4)  | 8 (88.9) | 253 (36.1) | 8 (33.3)  | 4 (36.4)  |

Data expressed as frequency (%) or mean (SD)

SD: Standard deviation, COPD: Chronic obstructive pulmonary disease, HIV/AIDS: Human immunodeficiency virus/acquired immune deficiency syndrome.

Supplementary Table 18. Survival analysis of laboratory-confirmed COVID-19 patients according to early or late use of antivirals.

| <b>Group</b>                                                                                               | <b>Total</b> | <b>Deaths</b> | <b>Survivors</b> | <b>Survival</b> | <b>P value</b> |
|------------------------------------------------------------------------------------------------------------|--------------|---------------|------------------|-----------------|----------------|
| Early use of antivirals (≤2 days)                                                                          | 579          | 64            | 515              | 88.9%           | -              |
| Type of antiviral                                                                                          |              |               |                  |                 |                |
| No antiviral/antibiotic                                                                                    | 114143       | 7351          | 106792           | 93.6%           | Reference      |
| Acyclovir                                                                                                  | 8            | 0             | 8                | 100%            | .5             |
| Amantadine                                                                                                 | 99           | 2             | 97               | 98%             | .08            |
| Lopinavir-Ritonavir                                                                                        | 1            | 0             | 1                | 100%            | .8             |
| Oseltamivir                                                                                                | 448          | 62            | 386              | 86.2%           | <.001          |
| Rimantadine                                                                                                | 16           | 0             | 16               | 100%            | .3             |
| Zanamivir                                                                                                  | 7            | 0             | 7                | 100%            | .5             |
| Late use of antivirals (>2 days)                                                                           | 323          | 28            | 295              | 91.3%           | -              |
| Type of antiviral                                                                                          |              |               |                  |                 |                |
| No antiviral/antibiotic                                                                                    | 114143       | 7351          | 106792           | 93.6%           | Reference      |
| Acyclovir                                                                                                  | 18           | 0             | 18               | 100%            | .3             |
| Amantadine                                                                                                 | 32           | 1             | 31               | 96.9%           | .4             |
| Lopinavir-Ritonavir                                                                                        | 8            | 2             | 6                | 75%             | .03            |
| Oseltamivir                                                                                                | 253          | 15            | 228              | 90.1%           | .04            |
| Rimantadine                                                                                                | 8            | 0             | 8                | 100%            | .5             |
| Zanamivir                                                                                                  | 4            | 0             | 4                | 100%            | .6             |
| Data expressed as number of patients or percentual of survival. P values were calculated by Log-Rank test. |              |               |                  |                 |                |

Supplementary Figure 1. Time from symptom onset to initiation of antivirals (A) and time from initiation of antivirals to hospitalization (B) in 903 patients with laboratory-confirmed COVID-19 receiving medical attention in one of 154 accredited medical units in Mexico City.

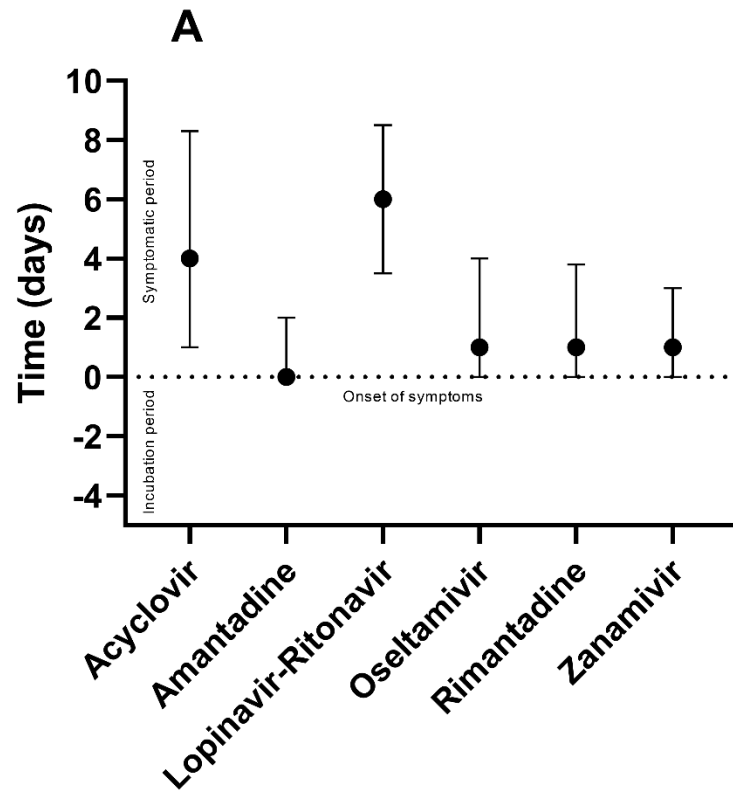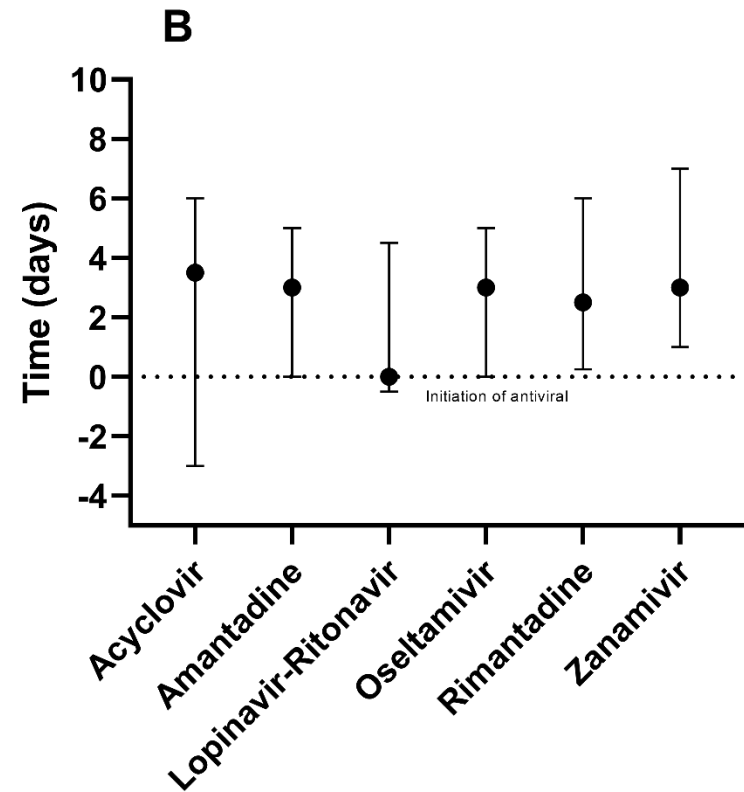

Supplementary Figure 2. Comparisons of hospitalization rates in 903 patients with laboratory-confirmed COVID-19 receiving medical attention in one of 154 accredited medical units in Mexico City who received early ( $\leq 2$  days) or late ( $>2$  days) antivirals.

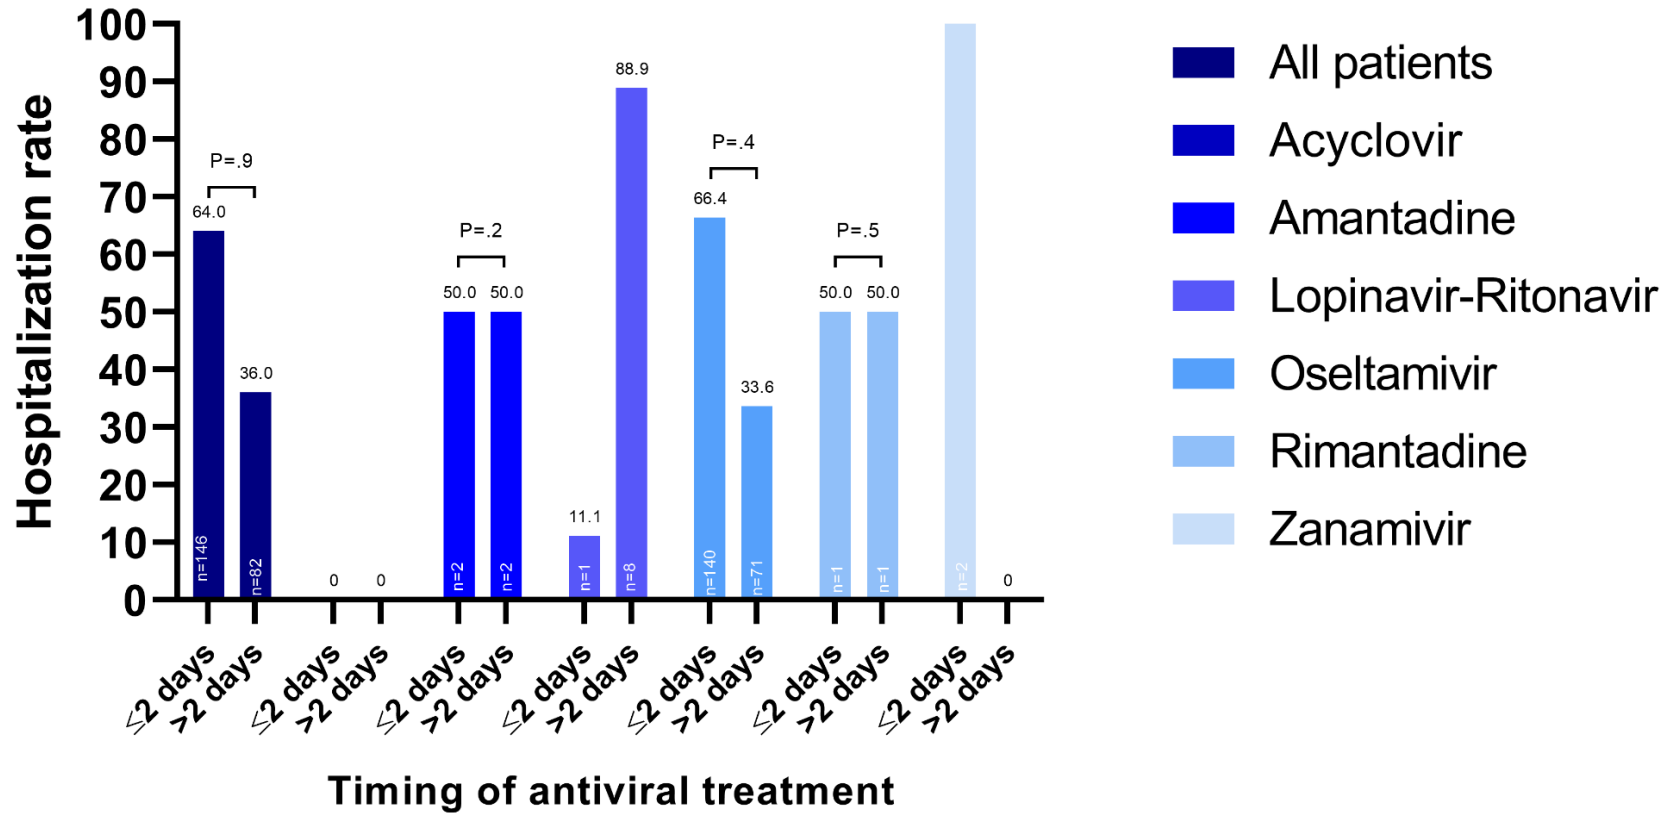

Supplement: Supplementary file [file media-1.pdf]
